# Supplementary material for: Pd(ii)-catalyzed C(sp3)–H arylation of amino acid derivatives with click-triazoles as removable directing groups
Source: Royal Society of Chemistry journal article supplement (doi:10.1039/c5ob00066a), 2015-01-01

## [Supporting Information]

# Pd(II)-catalyzed C(sp<sup>3</sup>)-H arylation of amino acid derivatives with click-triazoles as removable directing group

Guofu Zhang,<sup>a</sup> Xiaoqiang Xie,<sup>a</sup> Jianfei Zhu,<sup>a</sup> Shasha Li,<sup>a</sup> Chengrong Ding<sup>a\*</sup> and Ping Ding<sup>b</sup>

<sup>a</sup>College of Chemical Engineering, Zhejiang University of Technology, Hangzhou 310014, People's Republic of China.

<sup>b</sup>School of Public Health, Central South University, Changsha 410078, People's Republic of China

[.dingcr@zjut.edu.cn](mailto:dingcr@zjut.edu.cn).

## Table of Contents

Substrate Synthesis.....page S2-S6

Experimental Sections.....page S7-S9

Characterization Data for Products.....page S10-S17

NMR Spectra for Products.....page S18-S40

## General Experimental

Unless otherwise noted all commercial materials were used without further purification. Solvents were used after purification directed by *Purification of Laboratory Chemicals, 6th Ed.* Column chromatography was performed with silica gel (300-400 mesh) produced by Qingdao Marine Chemical Factory, Qingdao (China). NMR spectra were recorded on Bruker AVANCE III 500MHz instrument with TMS as internal standard. Coupling constants were reported in Hertz (Hz).

## Experimental Sections

### General Procedure for Preparation of Amino Acid Derivatives

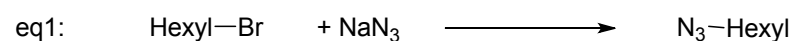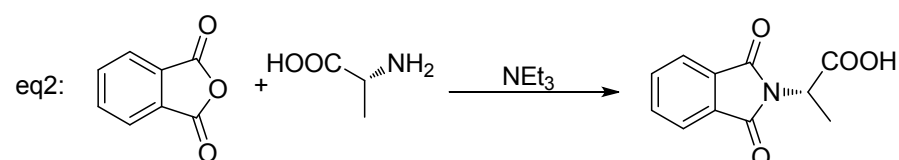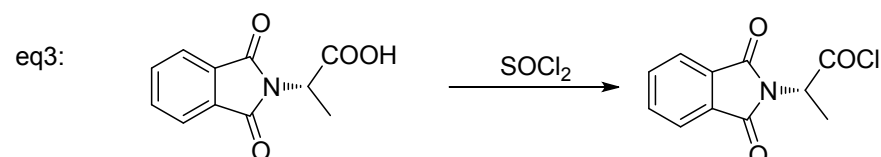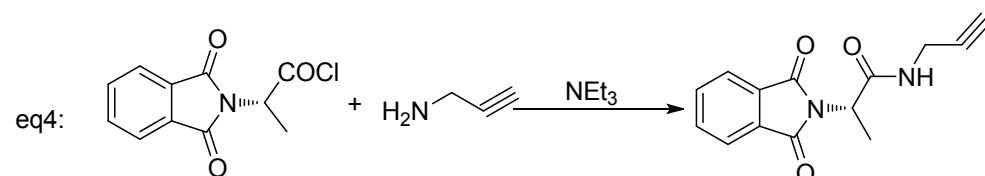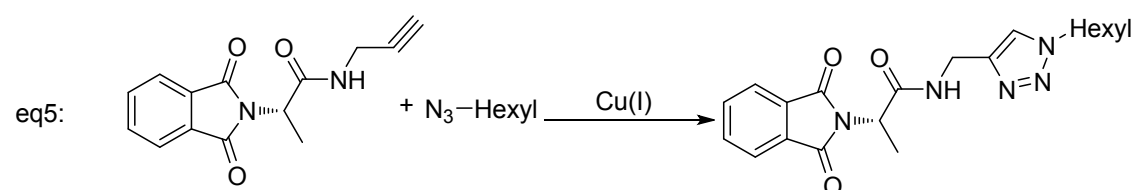

**eq1:**  $\text{NaN}_3$  (110.0 mol, 7.15 g) and 1-Bromohexane (100.0 mol, 16.51 g) were added in DMSO (200 mL) at room temperature and the reaction solutions were stirred overnight. When the reaction was finished,  $\text{H}_2\text{O}$  (50 mL) was added in the solution and extracted with methyl tertiary butyl ether ( $3 \times 200$  mL). The combined organic extracts were dried over anhydrous  $\text{Na}_2\text{SO}_4$  and concentrated under reduced pressure to give the 1-azidohexane as a colorless oil (70%, 8.90 g).

**eq2:** Amino acid (20.0 mmol), finely ground phthalic anhydride(20 mmol), toluene (45 mL), and Et<sub>3</sub>N (2.0 mmol, 0.28 mL) were added to a 100 mL round bottom flask. After refluxing the reaction mixture overnight, concentrated hydrochloric acid (0.4 mL) and water (50 mL) were added in the solution. The crude product was extracted with ethyl acetate and dried over anhydrous Na<sub>2</sub>SO<sub>4</sub>. The organic solvent was removed and recrystallized by MeOH/H<sub>2</sub>O to give the N-phthalimido-protected amino acid.

**eq3:** N-Phthalimido-protected amino acid (10.0 mmol), thionyl chloride (30.0 mmol) and four drops of DMF were added in toluene at 82 °C for 4 h. After the reaction, the excess of thionyl chloride and toluene was removed in vacuo, and the crude acyl chloride dissolved in dry CH<sub>2</sub>Cl<sub>2</sub> (15 mL) used for next reaction.

**eq4:** To a vigorously stirring solution of 2-propynylamine (10.0 mmol) and triethylamine(12.0 mmol) in CH<sub>2</sub>Cl<sub>2</sub> (30 mL) at 0 °C, the crude acyl chloride in CH<sub>2</sub>Cl<sub>2</sub> was added dropwise slowly. Then the reaction mixture was stirred for 5 h at rt. The reaction was quenched with saturated NaHCO<sub>3</sub>. The aqueous layer was extracted with CH<sub>2</sub>Cl<sub>2</sub>. The combined organic extracts was concentrated under reduced pressure and the crude product was purified by column chromatography on silica gel(*n*-hexane/ethyl acetate (v/v 1:1)).

**eq5:** The alkyne amide compound(10.0 mmol), 1-azidohexane(20.0 mmol), CuSO<sub>4</sub>(0.5 mmol), sodium ascorbate (1.0 mmol) were added in 30 mL acetone/H<sub>2</sub>O(v/v 1:1) solution at N<sub>2</sub> atmosphere. The reaction mixture was stirred overnight at rt. After the reaction, ammonia hydroxide(10 mL) was added in the solution and extracted with ethyl acetate. The organic extracts was concentrated under reduced pressure and the crude product was purified by column chromatography on silica gel(*n*-hexane/ethyl acetate (v/v 1:2)).

## Characterization Data for Amino Acid Derivatives

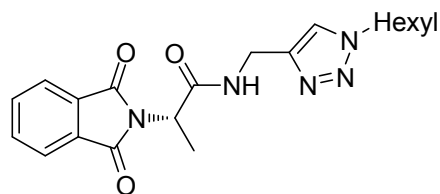

**1a:**  $^1\text{H}$  NMR (500 MHz,  $\text{CDCl}_3$ ):  $\delta$  0.88(t,  $J = 6.5$  Hz, 3H), 1.18(d,  $J = 3.0$  Hz, 3H), 1.30(s, 6H), 1.85(t,  $J = 6.5$  Hz, 2H), 4.25(t,  $J = 7.0$  Hz, 2H), 4.44(d,  $J = 3.0$  Hz, 2H), 4.92(q,  $J = 7.0$  Hz, 1H), 7.47 (s, 1H), 7.59(s, 1H), 7.69-7.72(dd,  $J_1 = 5.5$  Hz,  $J_2 = 3.0$  Hz, 2H), 7.78-7.81(dd,  $J_1 = 5.5$  Hz,  $J_2 = 3.0$  Hz, 2H).  $^{13}\text{C}$  NMR (125 MHz,  $\text{CDCl}_3$ ):  $\delta$  13.9, 15.2, 22.4, 26.1, 30.1, 31.1, 35.1, 49.0, 50.5, 123.4, 132.0, 134.1, 167.7, 169.4. HRMS (ESI)  $m/z$  calcd for  $\text{C}_{20}\text{H}_{25}\text{N}_5\text{O}_3$   $[\text{M}]^+$  383.2030; found 383.2032.

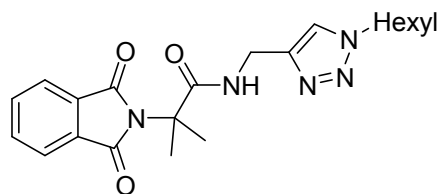

**2a:**  $^1\text{H}$  NMR (500 MHz,  $\text{CDCl}_3$ ):  $\delta$  0.88(t,  $J = 6.8$  Hz, 3H), 1.31 (s, 6H), 1.83(d,  $J = 5.0$  Hz, 6H), 1.86(t,  $J = 6.7$  Hz, 2H), 4.27(t,  $J = 7.3$  Hz, 2H), 4.44(d,  $J = 6.0$  Hz, 2H), 7.31 (d,  $J = 5.5$  Hz, 1H), 7.64(s, 1H), 7.66-7.68(m, 2H), 7.71-7.72(m, 2H).  $^{13}\text{C}$  NMR (125 MHz,  $\text{CDCl}_3$ ):  $\delta$  13.9, 22.4, 24.8, 26.1, 30.1, 31.1, 35.1, 50.5, 61.4, 122.7, 122.9, 132.0, 133.9, 144.5, 168.5, 173.3. HRMS (ESI)  $m/z$  calcd for  $\text{C}_{21}\text{H}_{27}\text{N}_5\text{O}_3$   $[\text{M}]^+$  397.2187; found 397.2174.

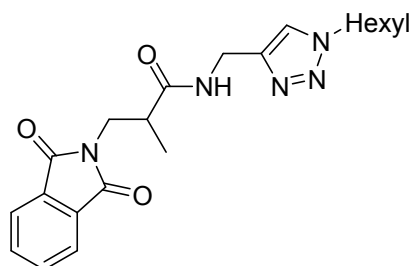

**3a:**  $^1\text{H}$  NMR (500 MHz,  $\text{CDCl}_3$ ):  $\delta$  0.89(t,  $J = 7.0$  Hz, 3H), 1.20 (d,  $J = 7.0$  Hz, 3H), 1.32(d,  $J = 7.0$  Hz, 6H), 1.90(t,  $J = 7.0$  Hz, 2H), 2.84(q,  $J = 7.0$  Hz, 1H), 3.73(q,  $J = 7.0$  Hz, 1H), 3.93(dd,  $J_1 = 13.5$  Hz,  $J_2 = 7.5$  Hz, 1H), 4.31 (t,  $J = 7.5$  Hz, 2H), 4.41-4.50(m, 2H), 6.49(s, 1H), 7.55(s, 1H), 7.72(dd,  $J_1 = 5.5$  Hz,  $J_2 = 3.0$  Hz, 2H), 7.82(dd,  $J_1 = 5.5$  Hz,  $J_2 = 3.0$  Hz, 2H).  $^{13}\text{C}$  NMR (125 MHz,  $\text{CDCl}_3$ ):  $\delta$  13.3, 15.6, 21.9, 25.8, 29.9, 30.8, 34.4, 39.4, 41.0, 50.2, 122.2, 123.3, 131.6, 134.3, 144.6, 168.4, 174.0. HRMS (ESI)  $m/z$  calcd for  $\text{C}_{21}\text{H}_{27}\text{N}_5\text{O}_3$   $[\text{M}]^+$  397.2187; found 397.2178.

## Chiral HPLC Data

HPLC Conditions:

Chiral stationary phase: HPLC Chiralpack® AD-Hcolumn (*n*-hexane/isopropanol = 55:45,

0.70 mL/min) Wavelength = 254 nm tr = 8.973 min (major), >93%ee.

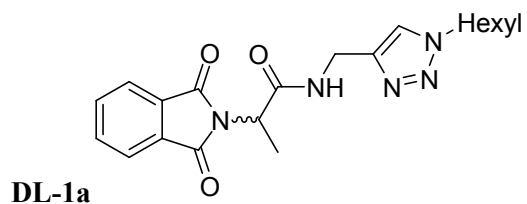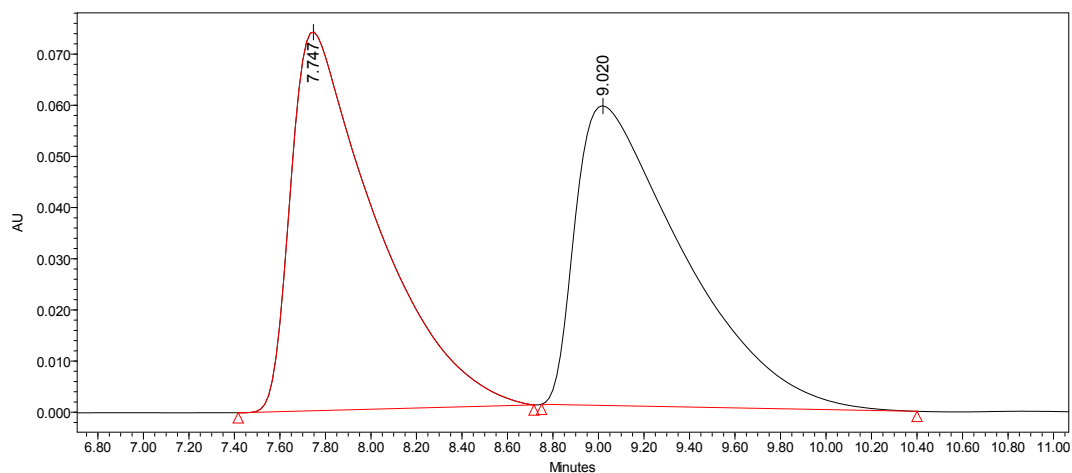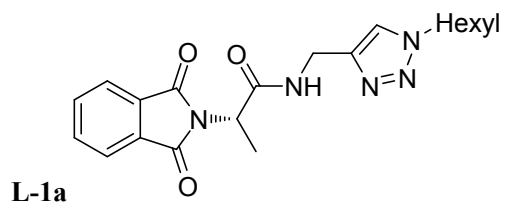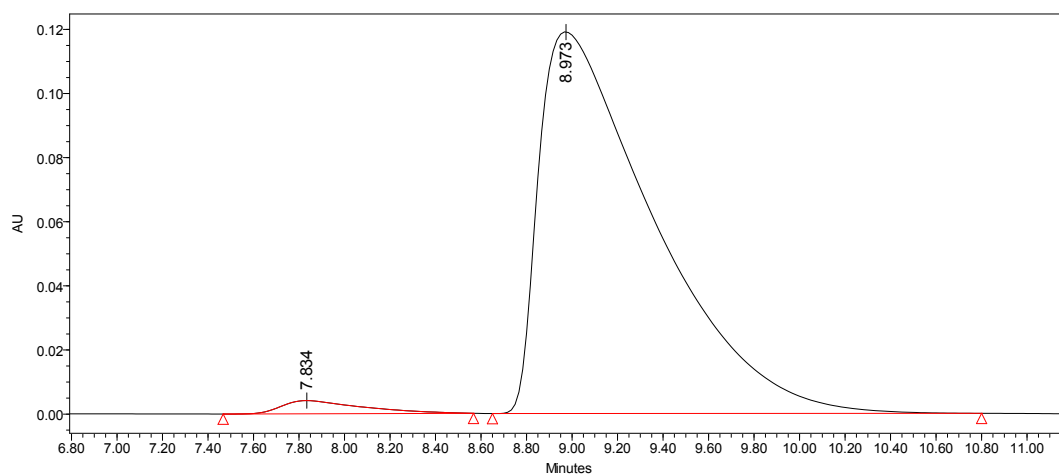

Area% report for 1a:

|   | Retention Time | Area    | % Area | Height | % Height |
|---|----------------|---------|--------|--------|----------|
| 1 | 7.834          | 100234  | 2.34   | 4110   | 3.33     |
| 2 | 8.973          | 4175524 | 97.66  | 119134 | 96.67    |

## References

- (1) Alvarez, S. G.; Alvarez, M. T. *Synthesis* **1997**, 413
- (2) He, J.; Li, S. H.; Deng, Y. Q.; Fu, H. Y.; Laforteza, B. N.; Spangler, J. E.; Homs, A.; Yu, J. Q. *Science* **2014**, *343*, 1216.
- (3) Tran, L. D.; Daugulis, O. *Angew. Chem., Int. Ed.* **2012**, *51*, 5188.

## Optimization of Reaction Conditions

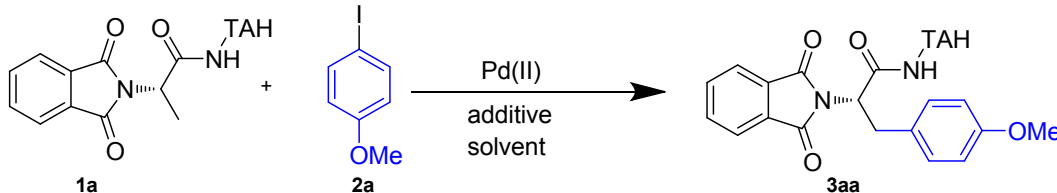

| entry    | catalyst                                    | additive                                 | solvent          | temp.(°C)  | time(h)  | yield <sup>b</sup> (%) |
|----------|---------------------------------------------|------------------------------------------|------------------|------------|----------|------------------------|
| 1        | Pd(OAc) <sub>2</sub> (10mol%)               | AgOAc(0.3mol)                            | DCE              | 100        | 5        | 39                     |
| 2        | Pd(OAc) <sub>2</sub> (10mol%)               | AgOAc(0.3mol)                            | DMF              | 100        | 5        | trace                  |
| 3        | Pd(OAc) <sub>2</sub> (10mol%)               | AgOAc(0.3mol)                            | <i>o</i> -xylene | 100        | 5        | ND <sup>c</sup>        |
| 4        | Pd(OAc) <sub>2</sub> (10mol%)               | AgOAc(0.3mol)                            | toluene          | 100        | 5        | ND                     |
| 5        | Pd(OAc) <sub>2</sub> (10mol%)               | AgOAc(0.3mol)                            | THF              | 100        | 5        | ND                     |
| 6        | Pd(OAc) <sub>2</sub> (10mol%)               | AgOAc(0.3mol)                            | <i>t</i> -BuOH   | 100        | 5        | 24                     |
| 7        | Pd(OAc) <sub>2</sub> (10mol%)               | AgOAc(0.3mol)                            | <i>t</i> -AmylOH | 100        | 5        | 31                     |
| <b>8</b> | <b>Pd(OAc)<sub>2</sub>(10mol%)</b>          | <b>AgOAc(0.3mol)</b>                     | <b>HFIP</b>      | <b>100</b> | <b>5</b> | <b>93</b>              |
| 9        | Pd(TFA) <sub>2</sub> (10mol%)               | AgOAc(0.3mol)                            | HFIP             | 100        | 5        | 50                     |
| 10       | PdCl <sub>2</sub> (10mol%)                  | AgOAc(0.3mol)                            | HFIP             | 100        | 5        | 57                     |
| 11       | Pd(PPh <sub>3</sub> ) <sub>4</sub> (10mol%) | AgOAc(0.3mol)                            | HFIP             | 100        | 5        | trace                  |
| 12       | Pd(OAc) <sub>2</sub> (10mol%)               | Ag <sub>2</sub> CO <sub>3</sub> (0.3mol) | HFIP             | 100        | 5        | 27                     |
| 13       | Pd(OAc) <sub>2</sub> (10mol%)               | AgNO <sub>3</sub> (0.3mol)               | HFIP             | 100        | 5        | 15                     |
| 14       | Pd(OAc) <sub>2</sub> (10mol%)               | AgSbF <sub>6</sub> (0.3mol)              | HFIP             | 100        | 5        | ND                     |
| 15       | Pd(OAc) <sub>2</sub> (10mol%)               | Ag <sub>2</sub> O(0.3mol)                | HFIP             | 100        | 5        | ND                     |
| 16       | Pd(OAc) <sub>2</sub> (5mol%)                | AgOAc(0.3mol)                            | HFIP             | 100        | 24       | 56                     |
| 17       | Pd(OAc) <sub>2</sub> (10mol%)               | AgOAc(0.2mol)                            | HFIP             | 100        | 24       | 68                     |
| 18       | Pd(OAc) <sub>2</sub> (10mol%)               | AgOAc(0.3mol)                            | HFIP             | 100        | 24       | 76 <sup>d</sup>        |
| 19       | Pd(OAc) <sub>2</sub> (10mol%)               | AgOAc(0.3mol)                            | HFIP             | 80         | 24       | 42                     |
| 20       | Pd(OAc) <sub>2</sub> (10mol%)               | AgOAc(0.3mol)                            | HFIP             | 100        | 3        | 70                     |

<sup>a</sup>The reactions were conducted with 0.20 mmol of **1a**, 10.0 mol% Pd(OAc)<sub>2</sub>, 0.30 mmol of **2a**, 0.30 mmol of additive, 1.0 ml of solvent and stirred for 5h unless other noted. <sup>b</sup>Determined by <sup>1</sup>H NMR spectroscopy using 1,3,5-trimethoxybenzene as an internal standard. <sup>c</sup>ND= Not Detected. <sup>d</sup>0.2 mmol of **2a**.

## General Procedure for Pd(II)-Catalyzed C(sp<sup>3</sup>)-H Arylation of Amino Acid Derivatives.

Pd(OAc)<sub>2</sub>(0.04 mmol), AgOAc (0.60 mmol), alkyl iodine (0.60 mmol), **1** (0.40 mol), HFIP(2 mL) were introduced into a 15 mL seal tube equipped with a magnetic stirrer in air. The mixture was fiercely stirred at 100 °C for 5 h. After cooling to room temperature, the reaction was diluted with ethyl acetate (15 mL) and then filtered through a pad of Celite and washed by ethyl acetate (50 mL). The organic solvent was evaporated under vacuum and the crude product was purified by column chromatograph using silica gel with *n*-hexane/ethyl acetate (v/v 1:2) as eluent.

### Gram-Scale Synthesis and Removal of the TAH group

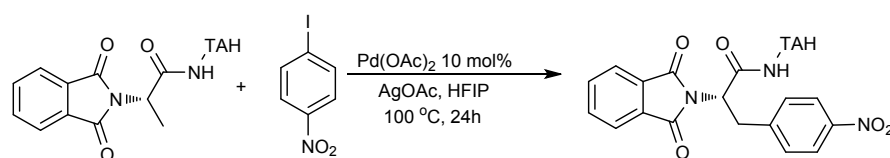

Pd(OAc)<sub>2</sub>(0.30 mmol, 67.4mg), AgOAc(4.50 mmol, 0.75g), 1-iodo-4-nitrobenzene **2i**(4.50 mmol, 1.12g), **1a**(3.0 mol, 1.15g), HFIP(15 mL) were introduced into a 100 mL seal tube equipped with a magnetic stirrer in air. The mixture was fiercely stirred at 100 °C for 24 h. After cooling to room temperature, the reaction was diluted with ethyl acetate (40 mL) and then filtered through a pad of Celite and washed by ethyl acetate (100 mL). The organic solvent was evaporated under vacuum and the crude product was purified by column chromatograph using silica gel with *n*-hexane/ethyl acetate (v/v 1:2) as eluent, and **3ai** was obtained in 93% yield(1.41 g).

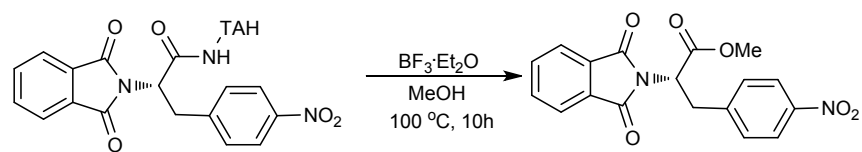

Substrate **3ai**(2.79 mmol, 1.41g), BF<sub>3</sub>·Et<sub>2</sub>O (20.30 mmol, 2.50 mL) were added in dry methanol(30 mL), and the solution was fiercely stirred at 100 °C for 10 h. After cooling to room temperature, Et<sub>3</sub>N (30.10 mmol, 4.20 mL) was added dropwise to the reaction solution with stirring. The organic solvent was evaporated under vacuum and the crude product was purified by column chromatograph using silica gel with *n*-hexane/ethyl acetate (v/v 20:1 to 2:1) as eluent. The organic solvent was evaporated



under vacuum and the product **4ai** was obtained of a colorless oil (86% yield, 0.86g).

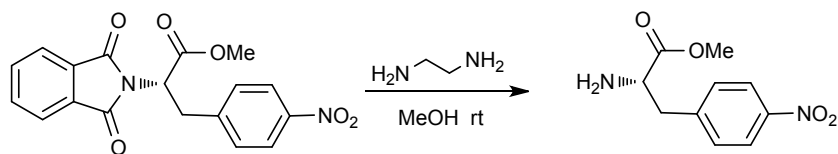

Substrate **3ai** (2.43 mmol, 0.86 g) was dissolved in MeOH (44 mL), then 80% Ethylenediamine (10.0 mmol, 0.60g) was added. The reaction was stirred at room temperature for 20 h and the solvent was removed in vacuo. Saturated aqueous NaHCO<sub>3</sub> was added, and the solution extracted with ethyl acetate(3 × 50 mL). The organic layer was washed with brine, dried over anhydrous Na<sub>2</sub>SO<sub>4</sub>, filtered, and concentrated.

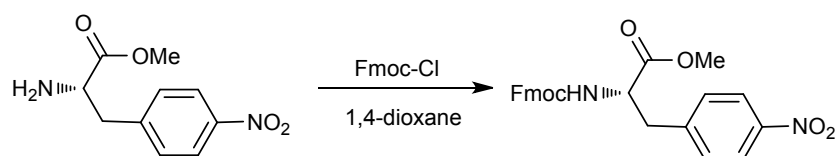

The residue was dissolved in 1,4-dioxane(15 mL), and 10% aq. NaHCO<sub>3</sub>(10 mL) was added. The mixture was cooled to 0 °C and Fmoc-Cl (2.52mmol, 0.65g) was added into the solution. After 1.5 h at 0 °C and 10 h at room temperature, H<sub>2</sub>O and EtOAc was added to the reaction mixture. The aqueous layer was then extracted with EtOAc twice and the combined organic layers were washed with brine, dried over MgSO<sub>4</sub>, filtered and concentrated. the crude product was purify by column chromatography with *n*-hexane/ethyl acetate (v/v 3:1 to 2:1) as eluent.

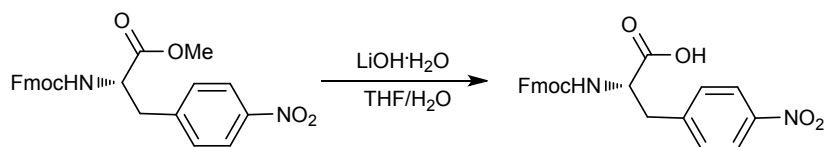

The substrate was dissolved in THF (10 mL). The solution was cooled to 0 °C, and a cold solution of LiOH·H<sub>2</sub>O (3.0 mmol, 0.126g) in H<sub>2</sub>O (10 mL) were added. The reaction was maintained at 0 °C for 1 hour. Then the reaction was acidified with HCl (1 N) and extracted with ethyl acetate(4 × 30 mL). The combined organic layers were dried over anhydrous Na<sub>2</sub>SO<sub>4</sub> and concentrated. The residue was purified by column chromatography using CH<sub>2</sub>Cl<sub>2</sub>/MeOH (10:1) as the eluent to afford the desired product **5ai** (49% for three steps, 0.51 g).

## Characterization Data for Products

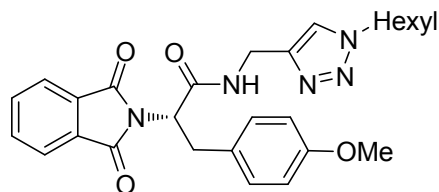

**3aa (Table 2, entry 1):**  $^1\text{H}$  NMR (500 MHz,  $\text{CDCl}_3$ ):  $\delta$  0.89(s, 3H), 1.32(s, 6H), 1.91(s, 2H), 3.43(t,  $J = 11.0$  Hz, 1H), 3.53(d,  $J = 10.5$  Hz, 1H), 3.68(s, 3H), 4.34(s, 2H), 4.57(s, 2H), 5.06(s, 1H), 6.67(d,  $J = 7.5$  Hz, 2H), 7.03(d,  $J = 7.5$  Hz, 2H), 7.66(s, 2H), 7.72(s, 2H), 7.79(s, 1H), 7.91(s, 1H).  $^{13}\text{C}$  NMR (125 MHz,  $\text{CDCl}_3$ ):  $\delta$  13.9, 22.3, 26.0, 29.8, 31.0, 33.7, 34.2, 51.5, 55.1, 55.2, 113.9, 123.4, 124.0, 128.6, 129.9, 131.6, 134.1, 158.3, 167.8, 169.1; HRMS (ESI)  $m/z$  calcd for  $\text{C}_{27}\text{H}_{31}\text{N}_5\text{O}_4$   $[\text{M}]^+$  489.2449; found 489.2467.

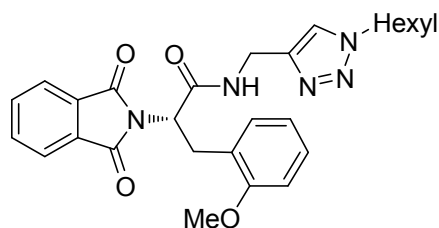

**3ab (Table 2, entry 2):**  $^1\text{H}$  NMR (500 MHz,  $\text{CDCl}_3$ ):  $\delta$  0.90(t,  $J = 6.5$  Hz, 3H), 1.33(s, 6H), 1.92(s, 2H), 3.41(dd,  $J_1 = 13.5$  Hz,  $J_2 = 10.5$  Hz, 1H), 3.60(dd,  $J_1 = 13.5$  Hz,  $J_2 = 4.5$  Hz, 1H), 3.74(s, 3H), 4.35(t,  $J = 7.5$  Hz, 2H), 4.61(s, 2H), 5.26(dd,  $J_1 = 10.5$  Hz,  $J_2 = 5.5$  Hz, 1H), 6.69(t,  $J = 7.0$  Hz, 1H), 6.75(d,  $J = 7.5$  Hz, 1H), 6.98(d,  $J = 6.0$  Hz, 1H), 7.12(t,  $J = 8.0$  Hz, 2H), 7.68(dd,  $J_1 = 5.0$  Hz,  $J_2 = 3.0$  Hz, 3H), 7.75(t,  $J = 5.5$  Hz, 2H).  $^{13}\text{C}$  NMR (125 MHz,  $\text{CDCl}_3$ ):  $\delta$  13.9, 22.4, 26.1, 30.0, 30.4, 31.1, 34.8, 51.0, 52.4, 55.2, 110.2, 120.5, 123.3, 125.0, 128.5, 130.9, 131.7, 134.0, 157.5, 167.8, 169.2; HRMS (ESI)  $m/z$  calcd for  $\text{C}_{27}\text{H}_{31}\text{N}_5\text{O}_4$   $[\text{M}]^+$  489.2449; found 489.2459.

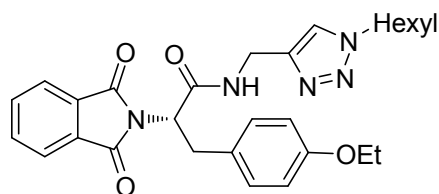

**3ac (Table 2, entry 3):**  $^1\text{H}$  NMR (500 MHz,  $\text{CDCl}_3$ ):  $\delta$  0.89(t,  $J = 7.0$  Hz, 3H), 1.30-1.35(m, 9H), 1.88(t,  $J = 7.0$  Hz, 2H), 3.43-3.54(m, 2H), 3.88-3.93(m, 2H), 4.30(t,  $J = 7.5$  Hz, 2H), 4.47-4.56(m, 2H), 5.08(dd,  $J_1 = 11.0$  Hz,  $J_2 = 6.0$  Hz, 1H), 6.68(d,  $J = 8.5$  Hz, 2H), 7.03(d,  $J = 8.5$  Hz, 2H), 7.13(t,  $J = 5.5$  Hz, 1H), 7.56(s, 1H), 7.68(dd,  $J_1 = 5.5$  Hz,  $J_2 = 3.0$  Hz, 2H), 7.75(dd,  $J_1 = 5.5$  Hz,  $J_2 = 3.0$  Hz, 2H).  $^{13}\text{C}$  NMR (125 MHz,  $\text{CDCl}_3$ ):  $\delta$  13.9, 14.7, 22.4, 26.1, 30.1, 31.1, 33.9, 35.1, 50.6, 55.5, 63.3, 114.6, 122.6, 123.5, 128.4, 129.9, 131.5, 134.2, 144.2, 157.8, 167.9, 168.8; HRMS (ESI)  $m/z$  calcd for  $\text{C}_{28}\text{H}_{33}\text{N}_5\text{O}_4$   $[\text{M}]^+$  503.2605; found 503.2627.

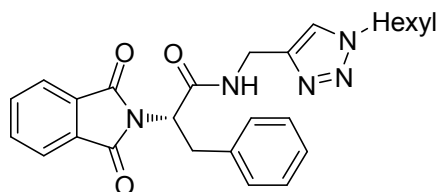

**3ad (Table 2, entry 4):**  $^1\text{H}$  NMR (500 MHz,  $\text{CDCl}_3$ ):  $\delta$  0.89(t,  $J = 6.5$  Hz, 3H), 1.31(s, 6H), 1.86(dd,  $J_1 = 13.5$  Hz,  $J_2 = 7.0$  Hz, 2H), 3.49-3.62(m, 2H), 4.27(t,  $J = 7.5$  Hz, 2H), 4.50(s, 2H). 5.12(q,  $J = 5.5$  Hz, 1H), 7.10-7.16(m, 5H), 7.25(s, 1H), 7.58(s, 1H), 7.66(dd,  $J_1 = 5.5$  Hz,  $J_2 = 3.5$  Hz, 2H), 7.73(dd,  $J_1 = 5.5$  Hz,  $J_2 = 3.5$  Hz, 2H).  $^{13}\text{C}$  NMR (125 MHz,  $\text{CDCl}_3$ ):  $\delta$  13.9, 22.4, 26.1, 30.0, 31.1, 34.6, 51.0, 52.3, 123.4, 126.8, 128.5, 128.9, 131.6, 134.1, 136.8, 167.8, 168.9; HRMS (ESI)  $m/z$  calcd for  $\text{C}_{26}\text{H}_{29}\text{N}_5\text{O}_3$   $[\text{M}]^+$  459.2343; found 459.2320.

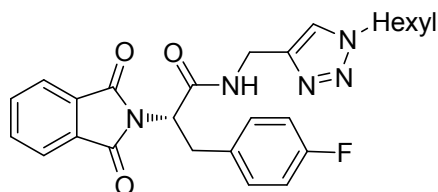

**3ae (Table 2, entry 5):**  $^1\text{H}$  NMR (500 MHz,  $\text{CDCl}_3$ ):  $\delta$  0.90(t,  $J = 5.5$  Hz, 3H), 1.33(s, 6H), 1.90(s, 2H), 3.47-3.59(m, 2H), 4.32(t,  $J = 7.0$  Hz, 2H), 4.54(s, 2H). 5.09(dd,  $J_1 = 11.5$  Hz,  $J_2 = 5.0$  Hz, 1H), 6.84(t,  $J = 8.0$  Hz, 2H), 7.10(dd,  $J_1 = 8.5$  Hz,  $J_2 = 6.0$  Hz, 2H), 7.60(s, 1H), 7.70(t,  $J = 4.0$  Hz, 2H), 7.75(t,  $J = 5.0$  Hz, 2H).  $^{13}\text{C}$  NMR (125 MHz,  $\text{CDCl}_3$ ):  $\delta$  13.9, 22.3, 26.1, 30.2, 31.1, 34.1, 35.3, 50.4, 55.2, 120.9, 122.2, 123.6, 130.6, 131.4, 131.8, 134.3, 135.9, 144.2, 167.8, 168.3.  $^{19}\text{F}$  NMR (376 MHz,  $\text{DMSO}-d_6$ ):  $\delta$  -115.75; HRMS (ESI)  $m/z$  calcd for  $\text{C}_{26}\text{H}_{28}\text{FN}_5\text{O}_3$   $[\text{M}]^+$  477.2249; found 477.2267.

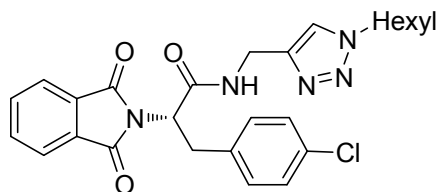

**3af (Table 2, entry 6):**  $^1\text{H}$  NMR (500 MHz,  $\text{CDCl}_3$ ):  $\delta$  0.90(t,  $J = 6.5$  Hz, 3H), 1.33(s, 6H), 1.92(t,  $J = 7.0$  Hz, 2H), 3.47-3.60(m, 2H), 4.35(t,  $J = 7.0$  Hz, 2H), 4.52-4.62(m, 2H). 5.09(dd,  $J_1 = 11.5$  Hz,  $J_2 = 5.0$  Hz, 1H), 7.08(d,  $J = 8.5$  Hz, 2H), 7.12(t,  $J = 8.5$  Hz, 2H), 7.54(s, 1H), 7.67(s, 1H), 7.70(dd,  $J_1 = 6.0$  Hz,  $J_2 = 3.5$  Hz, 2H), 7.76(dd,  $J_1 = 5.5$  Hz,  $J_2 = 2.5$  Hz, 2H).  $^{13}\text{C}$  NMR (125 MHz,  $\text{CDCl}_3$ ):  $\delta$  13.9, 22.4, 26.1, 29.9, 31.0, 33.9, 34.6, 51.2, 55.0, 123.3, 123.6, 128.7, 130.3, 131.5, 132.7, 134.4, 135.2, 143.6, 167.7, 168.6; HRMS (ESI)  $m/z$  calcd for  $\text{C}_{26}\text{H}_{28}\text{ClN}_5\text{O}_3$   $[\text{M}]^+$  493.1953; found 493.1939.

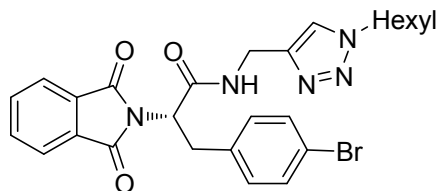

**3ag (Table 2, entry 7):**  $^1\text{H}$  NMR (500 MHz,  $\text{CDCl}_3$ ):  $\delta$  0.89(t,  $J = 6.0$  Hz, 3H), 1.31(s, 6H), 1.86(s, 2H), 3.48-3.58(m, 2H), 4.27(t,  $J = 6.5$  Hz, 2H), 4.47(s, 2H). 5.09(dd,  $J_1 = 11.5$  Hz,  $J_2 = 5.0$  Hz, 1H), 7.01(d,  $J = 8.5$  Hz, 2H), 7.26(s, 1H), 7.52(s, 1H), 7.56(s, 1H), 7.68(t,  $J = 3.0$  Hz, 2H), 7.73(t,  $J = 6.5$  Hz, 2H).  $^{13}\text{C}$  NMR (125 MHz,  $\text{CDCl}_3$ ):  $\delta$  13.9, 22.3, 26.1, 30.1, 31.1, 34.1, 35.1, 50.5, 55.0, 120.8, 123.5, 130.6, 131.4, 131.6, 134.2, 135.8, 167.7, 168.4; HRMS (ESI)  $m/z$  calcd for  $\text{C}_{26}\text{H}_{28}\text{BrN}_5\text{O}_3$   $[\text{M}]^+$  537.1448; found 537.1451.

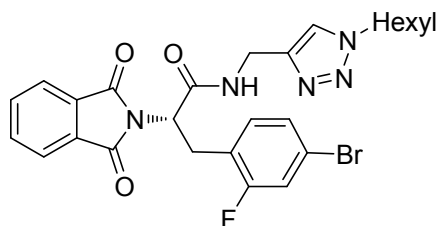

**3ah (Table 2, entry 8):**  $^1\text{H}$  NMR (500 MHz,  $\text{CDCl}_3$ ):  $\delta$

0.90(t,  $J = 5.5$  Hz, 3H), 1.32(s, 6H), 1.87(s, 2H), 3.50-3.61(m, 2H), 4.28(t,  $J = 7.0$  Hz, 2H), 4.50(dd,  $J_1 = 6.0$  Hz,  $J_2 = 1.5$  Hz, 2H), 5.12(dd,  $J_1 = 11.5$  Hz,  $J_2 = 6.0$  Hz, 1H), 6.98(t,  $J = 8.0$  Hz, 2H), 7.06(dd,  $J_1 = 8.0$  Hz,  $J_2 = 2.0$  Hz, 1H), 7.12(dd,  $J_1 = 9.0$  Hz,  $J_2 = 1.5$  Hz, 1H), 7.53(s, 1H), 7.71(dd,  $J_1 = 5.5$  Hz,  $J_2 = 2.0$  Hz, 2H), 7.78(dd,  $J_1 = 5.5$  Hz,  $J_2 = 3.0$  Hz, 2H).  $^{13}\text{C}$  NMR (125 MHz,  $\text{CDCl}_3$ ):  $\delta$  13.9, 22.4, 26.2, 28.4, 30.2, 31.2, 35.3, 50.5, 53.6, 119.0, 119.3, 122.3, 123.6, 127.5, 131.5, 132.3, 132.4, 134.4, 167.6, 168.0.  $^{19}\text{F}$  NMR (376 MHz,  $\text{DMSO}-d_6$ ):  $\delta$  -114.56; HRMS (ESI)  $m/z$  calcd for  $\text{C}_{26}\text{H}_{27}\text{BrFN}_5\text{O}_3$   $[\text{M}]^+$  555.1354; found 555.1365.

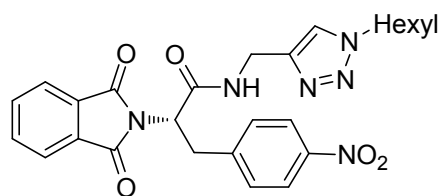

**3ai (Table 2, entry 9):**  $^1\text{H}$  NMR (500 MHz,  $\text{CDCl}_3$ ):  $\delta$

0.90(t,  $J = 6.0$  Hz, 3H), 1.32(s, 6H), 1.86(s, 2H), 3.65-3.74(m, 2H), 4.26(t,  $J = 7.0$  Hz, 2H), 4.48(s, 2H), 5.16(d,  $J = 7.5$  Hz, 1H), 7.33(d,  $J = 8.5$  Hz, 2H), 7.56(s, 2H), 7.70(s, 2H), 7.73(s, 2H), 8.02(d,  $J = 8.5$  Hz, 2H).  $^{13}\text{C}$  NMR (125 MHz,  $\text{CDCl}_3$ ):  $\delta$  13.9, 22.5, 26.1, 30.2, 31.2, 34.6, 35.2, 50.7, 54.7, 123.7, 123.8, 129.9, 131.4, 134.6, 144.8, 147.1, 167.7, 168.0; HRMS (ESI)  $m/z$  calcd for  $\text{C}_{26}\text{H}_{28}\text{N}_6\text{O}_5$   $[\text{M}]^+$  504.2194; found 504.2186.

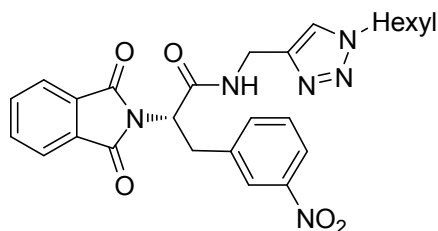

**3aj (Table 2, entry 10):**  $^1\text{H}$  NMR (500 MHz,  $\text{CDCl}_3$ ):  $\delta$

0.88(t,  $J = 7.5$  Hz, 3H), 1.29(s, 6H), 1.83(t,  $J = 6.5$  Hz, 2H), 3.63-3.78(m, 2H), 4.24(t,  $J = 7.0$  Hz, 2H), 4.43(t,  $J = 5.0$  Hz, 2H), 5.15(q,  $J = 5.5$  Hz, 1H), 7.34(t,  $J = 7.5$  Hz, 1H), 7.50(d,  $J = 7.0$  Hz, 1H), 7.51(s, 1H), 7.66(dd,  $J_1 = 6.0$  Hz,  $J_2 = 3.5$  Hz, 2H), 7.71(dd,  $J_1 = 6.0$  Hz,  $J_2 = 3.5$  Hz, 2H), 7.97(dd,  $J_1 = 9.0$  Hz,  $J_2 = 1.5$  Hz, 1H), 8.02(s, 1H), 8.05(s, 1H).  $^{13}\text{C}$  NMR (125 MHz,  $\text{CDCl}_3$ ):  $\delta$  13.9, 22.4, 26.1, 30.1, 31.1, 34.3, 34.8, 50.7, 54.7, 122.0, 123.5, 123.9, 129.5, 131.4, 134.3, 135.2, 139.3, 148.2, 167.7, 168.1; HRMS (ESI)  $m/z$  calcd for  $\text{C}_{26}\text{H}_{28}\text{N}_6\text{O}_5$   $[\text{M}]^+$  504.2194; found 504.2217.

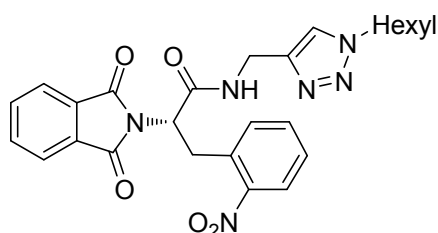

**3ak (Table 2, entry 11):**  $^1\text{H}$  NMR (500 MHz,  $\text{CDCl}_3$ ):  $\delta$

0.90(t,  $J = 6.5$  Hz, 3H), 1.32(s, 6H), 1.89(t,  $J = 5.5$  Hz, 2H), 3.67-3.73(m, 1H), 4.05(dd,  $J_1 =$

14.5 Hz,  $J_2 = 4.5$  Hz, 1H), 4.30(t,  $J = 7.5$  Hz, 2H), 4.54(d,  $J = 5.5$  Hz, 2H), 5.31(dd,  $J_1 = 11.0$  Hz,  $J_2 = 4.5$  Hz, 1H), 6.90(s, 1H), 7.21(dd,  $J_1 = 7.5$  Hz,  $J_2 = 2.5$  Hz, 1H), 7.33-7.35(m, 2H), 7.57(s, 1H), 7.71(dd,  $J_1 = 5.0$  Hz,  $J_2 = 3.0$  Hz, 2H), 7.77(dd,  $J_1 = 5.0$  Hz,  $J_2 = 3.0$  Hz, 2H), 8.00 (dd,  $J_1 = 7.0$  Hz,  $J_2 = 1.5$  Hz, 1H).  $^{13}\text{C}$  NMR (125 MHz,  $\text{CDCl}_3$ ):  $\delta$  13.9, , 22.4, 26.1, 30.1, 31.1, 32.6, 35.2, 50.53, 53.5, 122.6, 123.4, 125.4, 128.3, 131.5, 132.8, 132.9, 133.3, 134.2, 149.0, 167.7, 168.0; HRMS (ESI)  $m/z$  calcd for  $\text{C}_{26}\text{H}_{28}\text{N}_6\text{O}_5$   $[\text{M}]^+$  504.2194; found 504.2170.

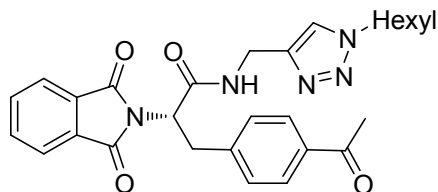

**3al (Table 2, entry 12):**  $^1\text{H}$  NMR (500 MHz,  $\text{CDCl}_3$ ):  $\delta$

0.89(t,  $J = 6.5$  Hz, 3H), 1.30(s, 6H), 1.85(s, 2H), 2.49(s, 3H), 3.59-3.68(m, 2H), 4.25(t,  $J = 7.5$  Hz, 2H), 4.46(t,  $J = 15.0$  Hz, 2H), 5.15(q,  $J = 5.5$  Hz, 1H), 7.23(d,  $J = 7.5$  Hz, 2H), 7.55(s, 2H), 7.66(dd,  $J_1 = 6.0$  Hz,  $J_2 = 3.5$  Hz, 2H), 7.71(dd,  $J_1 = 5.5$  Hz,  $J_2 = 3.5$  Hz, 2H), 7.74(d,  $J = 8.5$  Hz, 2H).  $^{13}\text{C}$  NMR (125 MHz,  $\text{CDCl}_3$ ):  $\delta$  13.9, 22.4, 26.1, 26.5, 30.1, 31.1, 34.6, 35.1, 50.4, 54.8, 123.5, 128.6, 129.1, 131.4, 134.2, 135.8, 142.6, 167.8, 168.3, 197.7; HRMS (ESI)  $m/z$  calcd for  $\text{C}_{28}\text{H}_{31}\text{N}_5\text{O}_4$   $[\text{M}]^+$  501.2449; found 501.2465.

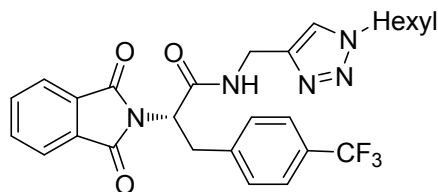

**3am (Table 2, entry 13):**  $^1\text{H}$  NMR (500 MHz,

$\text{CDCl}_3$ ):  $\delta$  0.89(t,  $J = 6.5$  Hz, 3H), 1.32(s, 6H), 1.87(t,  $J = 7.0$  Hz, 2H), 3.59-3.69(m, 2H), 4.27(t,  $J = 7.0$  Hz, 2H), 4.49(t,  $J = 5.0$  Hz, 2H), 5.15(q,  $J = 5.5$  Hz, 1H), 7.26(s, 1H), 7.32(s, 1H), 7.42(d,  $J = 8.0$  Hz, 2H), 7.54(s, 1H), 7.69(dd,  $J_1 = 5.5$  Hz,  $J_2 = 3.0$  Hz, 2H), 7.75(dd,  $J_1 = 5.5$  Hz,  $J_2 = 3.0$  Hz, 2H).  $^{13}\text{C}$  NMR (125 MHz,  $\text{CDCl}_3$ ):  $\delta$  13.9, 22.4, 26.1, 30.1, 31.1, 34.4, 35.1, 50.4, 54.9, 123.5, 123.7, 128.2, 128.5, 129.2, 131.4, 134.3, 134.5, 167.8, 168.2.  $^{19}\text{F}$  NMR (376 MHz,  $\text{DMSO}-d_6$ ):  $\delta$  -62.99; HRMS (ESI)  $m/z$  calcd for  $\text{C}_{27}\text{H}_{28}\text{F}_3\text{N}_5\text{O}_3$   $[\text{M}]^+$  527.2217; found 527.2234.

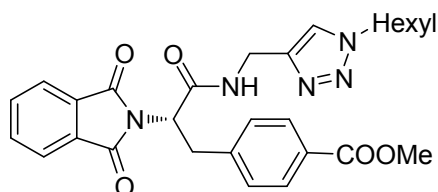

**3an (Table 2, entry 14):**  $^1\text{H}$  NMR (500 MHz,  $\text{CDCl}_3$ ):

$\delta$  0.87(t,  $J = 6.5$  Hz, 3H), 1.27(s, 6H), 1.80(s, 2H), 3.56-3.68(m, 2H), 3.80(s, 3H), 4.18(t,  $J = 7.5$  Hz, 2H), 4.38(s, 2H), 5.13(dd,  $J_1 = 11.0$  Hz,  $J_2 = 5.0$  Hz, 1H), 7.17(d,  $J = 8.5$  Hz, 2H), 7.54(s, 1H), 7.60(t,  $J = 4.0$  Hz, 2H), 7.65(t,  $J = 4.0$  Hz, 2H), 7.78(d,  $J = 8.0$  Hz, 2H), 8.07(s, 1H).  $^{13}\text{C}$  NMR (125 MHz,  $\text{CDCl}_3$ ):  $\delta$  13.8, 22.3, 26.1, 30.0, 31.1, 34.6, 35.0, 50.4, 51.9, 54.8, 122.7, 123.3, 128.7, 128.9, 129.7, 131.5, 134.0, 142.5, 144.4, 166.7, 167.7, 168.3; HRMS (ESI)  $m/z$  calcd for  $\text{C}_{28}\text{H}_{31}\text{N}_5\text{O}_5$   $[\text{M}]^+$  517.2398; found 517.2399.

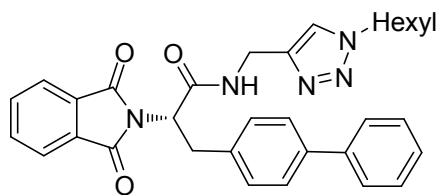

**3ao (Table 2, entry 15):**  $^1\text{H}$  NMR (500 MHz,  $\text{CDCl}_3$ ):  $\delta$  0.91(t,  $J = 6.5$  Hz, 3H), 1.35(s, 6H), 1.99(s, 2H), 3.52(t,  $J = 11.0$  Hz, 1H), 3.70(dd,  $J_1 = 13.0$  Hz,  $J_2 = 4.5$  Hz, 1H), 4.46(d,  $J = 6.0$  Hz, 2H), 4.69(d,  $J = 13.0$  Hz, 1H), 4.79(d,  $J = 13.0$  Hz, 1H), 5.20(dd,  $J_1 = 11.0$  Hz,  $J_2 = 4.5$  Hz, 1H), 7.22(d,  $J = 8.0$  Hz, 2H), 7.30(t,  $J = 7.5$  Hz, 1H), 7.36-7.40(m, 4H), 7.48(d,  $J = 7.5$  Hz, 2H), 7.66(dd,  $J_1 = 5.0$  Hz,  $J_2 = 3.0$  Hz, 2H), 7.75(dd,  $J_1 = 5.0$  Hz,  $J_2 = 3.0$  Hz, 2H), 8.03(s, 1H), 8.38(s, 1H).  $^{13}\text{C}$  NMR (125 MHz,  $\text{CDCl}_3$ ):  $\delta$  13.9, 22.4, 26.2, 30.1, 31.1, 34.3, 35.1, 50.6, 55.3, 122.7, 123.5, 126.9, 127.2, 128.7, 129.3, 131.5, 134.2, 135.8, 139.6, 140.5, 144.2, 167.8, 168.7; HRMS (ESI)  $m/z$  calcd for  $\text{C}_{32}\text{H}_{33}\text{N}_5\text{O}_3$   $[\text{M}]^+$  535.2656; found 535.2663.

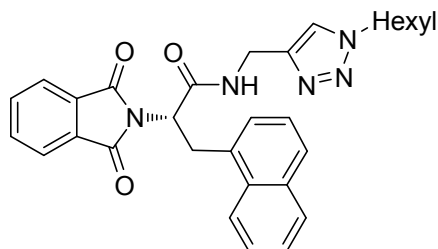

**3ap (Table 2, entry 16):**  $^1\text{H}$  NMR (500 MHz,  $\text{CDCl}_3$ ):  $\delta$  0.89(t,  $J = 6.5$  Hz, 3H), 1.30(s, 6H), 1.83(t,  $J = 7.5$  Hz, 2H), 3.84(dd,  $J_1 = 15.0$  Hz,  $J_2 = 11.0$  Hz, 1H), 4.18-4.24(m, 2H), 4.40-4.50(m, 2H), 5.30(dd,  $J_1 = 10.5$  Hz,  $J_2 = 5.0$  Hz, 1H), 7.15(t,  $J = 3.0$  Hz, 2H), 7.43-7.53(m, 4H), 7.61-7.67(m, 5H), 7.78(d,  $J = 7.5$  Hz, 1H), 8.09(d,  $J = 7.5$  Hz, 1H).  $^{13}\text{C}$  NMR (125 MHz,  $\text{CDCl}_3$ ):  $\delta$  13.9, 22.4, 25.9, 29.6, 30.0, 31.7, 33.5, 52.5, 54.1, 123.2, 123.4, 125.1, 125.8, 126.4, 127.3, 127.8, 128.9, 131.6, 132.9, 133.8, 134.1, 167.7, 169.3; HRMS (ESI)  $m/z$  calcd for  $\text{C}_{30}\text{H}_{31}\text{N}_5\text{O}_3$   $[\text{M}]^+$  509.2500; found 509.2510.

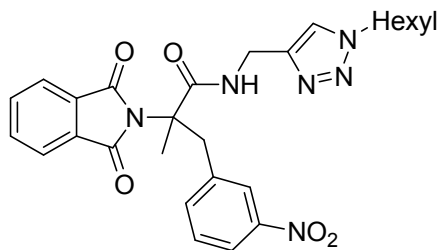

**3bj:**  $^1\text{H}$  NMR (500 MHz,  $\text{CDCl}_3$ ):  $\delta$  0.89(dd,  $J_1 = 10.0$  Hz,  $J_2 = 6.5$  Hz, 3H), 1.30(d,  $J = 10.0$  Hz, 6H), 1.83(s, 3H), 1.86(d,  $J = 9.0$  Hz, 2H), 3.40-3.64(m, 1H), 3.89-4.03(m, 1H), 4.12-4.28(m, 3H), 4.35-4.42(m, 1H), 7.30-7.37(m, 1H), 7.54-7.61(m, 3H), 7.65-7.68(m, 3H), 7.69-7.86(m, 1H), 8.00-8.04(m, 2H).  $^{13}\text{C}$  NMR (125 MHz,  $\text{CDCl}_3$ ):  $\delta$  13.9, 22.4, 24.8, 26.1, 30.1, 31.2, 34.9, 39.7, 40.5, 50.4, 122.3, 123.0, 123.1, 125.6, 129.0, 131.4, 134.0, 134.3, 136.9, 148.0, 168.5, 168.9; HRMS (ESI)  $m/z$  calcd for  $\text{C}_{27}\text{H}_{30}\text{N}_6\text{O}_5$   $[\text{M}]^+$  518.2350; found 518.2363.

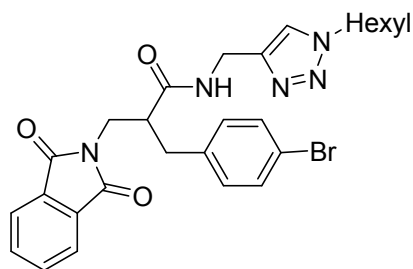

**3cg:**  $^1\text{H}$  NMR (500 MHz,  $\text{CDCl}_3$ ):  $\delta$  0.90(t,  $J = 7.0$  Hz, 3H), 1.34(t,  $J = 5.5$  Hz, 6H), 1.90(s, 2H), 2.83(dd,  $J_1 = 13.0$  Hz,  $J_2 = 4.0$  Hz, 1H), 3.02(dd,  $J_1 = 14.0$  Hz,  $J_2 = 10.0$  Hz, 1H), 3.11(s, 1H), 3.83(dd,  $J_1 = 14.0$  Hz,  $J_2 = 5.0$  Hz, 1H), 3.96(dd,  $J_1 = 14.0$  Hz,  $J_2 = 7.5$  Hz, 1H), 4.44(d,  $J = 6.5$  Hz, 4H), 7.10(d,  $J = 7.5$  Hz, 2H), 7.31(d,  $J = 8.5$  Hz, 2H), 7.69(q,  $J = 3.0$  Hz, 3H), 7.75(dd,  $J_1 = 5.5$  Hz,  $J_2 = 3.5$  Hz, 3H).  $^{13}\text{C}$  NMR (125 MHz,  $\text{CDCl}_3$ ):  $\delta$  13.9, 22.3, 25.9, 29.5, 31.0, 32.3, 35.6, 40.0, 47.0, 53.3, 120.2, 123.3, 130.9, 131.4, 131.9, 134.1, 137.3, 168.4, 173.1; HRMS (ESI)  $m/z$  calcd for  $\text{C}_{27}\text{H}_{30}\text{BrN}_5\text{O}_3$   $[\text{M}]^+$  551.1604; found 551.1608.

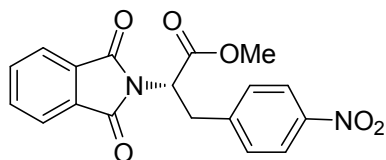

**4ai:**  $^1\text{H}$  NMR (500 MHz,  $\text{CDCl}_3$ ): 3.64-3.73(m, 2H), 3.80(s, 3H), 5.19(dd,  $J_1 = 11.0$  Hz,  $J_2 = 6.0$  Hz, 1H), 7.36(d,  $J = 8.5$  Hz, 2H), 7.73(q,  $J = 2.5$  Hz, 2H), 7.80(q,  $J = 2.5$  Hz, 2H), 8.07(d,  $J = 9.0$  Hz, 2H).  $^{13}\text{C}$  NMR (125 MHz,  $\text{CDCl}_3$ ):  $\delta$  34.7, 51.5, 53.0, 123.7, 123.9, 129.9, 131.4, 134.4, 144.5, 147.1, 167.3, 168.7.

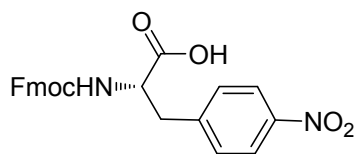

**5ai:**  $^1\text{H}$  NMR (500 MHz,  $\text{DMSO}-d_6$ ): 3.02(dd,  $J_1 = 14.0$  Hz,  $J_2 = 11.0$  Hz, 1H), 3.25(dd,  $J_1 = 14.5$  Hz,  $J_2 = 4.5$  Hz, 1H), 4.15-4.30(m, 4H), 7.26-7.31(m, 2H), 7.40(t,  $J = 8.0$  Hz, 2H), 7.55(d,  $J = 9.0$  Hz, 2H), 7.62(dd,  $J_1 = 7.0$  Hz,  $J_2 = 3.0$  Hz, 2H), 7.82(d,  $J = 8.5$  Hz, 1H), 7.88(d,  $J = 7.5$  Hz, 2H), 8.15(d,  $J = 8.5$  Hz, 2H), 12.9(s, 1H).  $^{13}\text{C}$  NMR (125 MHz,  $\text{CDCl}_3$ ):  $\delta$  36.2, 45.6, 54.7, 65.6, 120.0, 123.2, 125.1, 127.0, 127.5, 130.4, 140.7, 143.6, 143.7, 146.2, 146.3, 155.9, 172.7.

## Chiral HPLC Data

HPLC Conditions:

Chiral stationary phase: HPLC Chiralpack® AD-Hcolumn (*n*-hexane/isopropanol = 55:45, 0.70 mL/min) Wavelength = 254 nm  $t_r$  = 13.649 min (major), >96% ee.

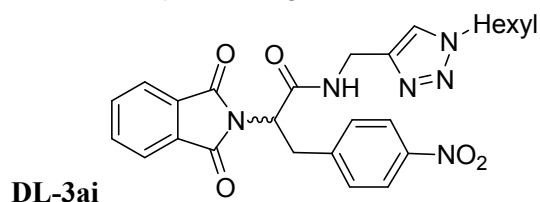

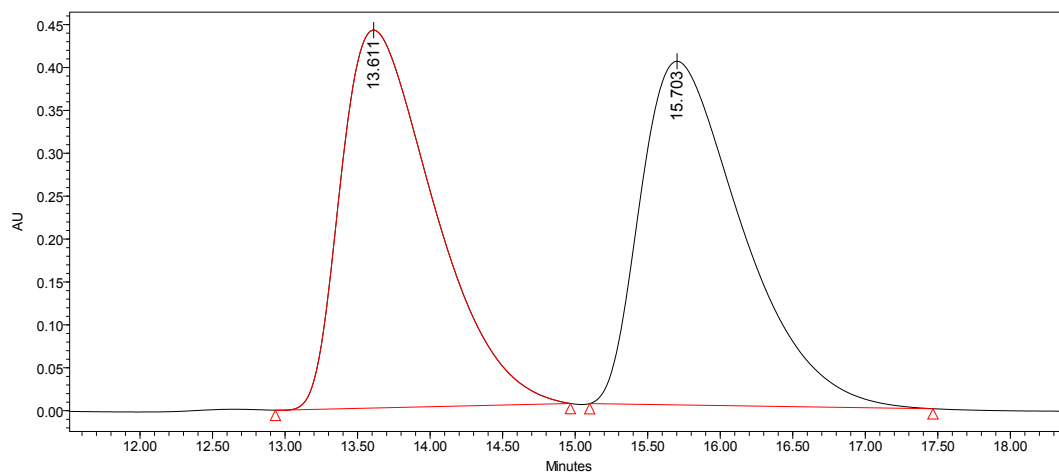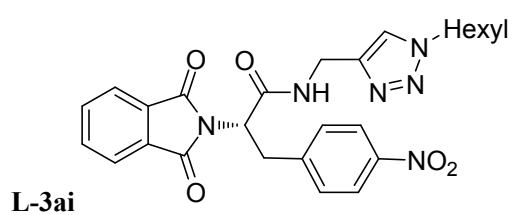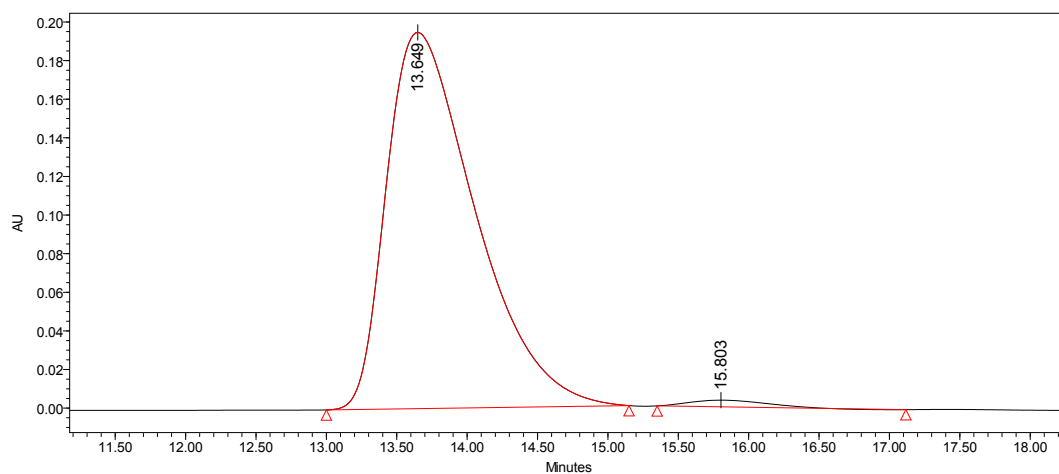

Area% report for **3ai**:

|   | Retention Time | Area    | % Area | Height | % Height |
|---|----------------|---------|--------|--------|----------|
| 1 | 13.649         | 8539415 | 98.41  | 194855 | 98.25    |
| 2 | 15.803         | 138383  | 1.59   | 3462   | 1.75     |

HPLC Conditions:

Chiral stationary phase: HPLC Chiralpack® AD-Hcolumn (*n*-hexane/isopropanol = 50:50, 0.60 mL/min) Wavelength = 254 nm *tr* = 13.649 min (major), >93% ee.



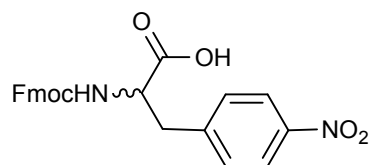

**DL-5ai**

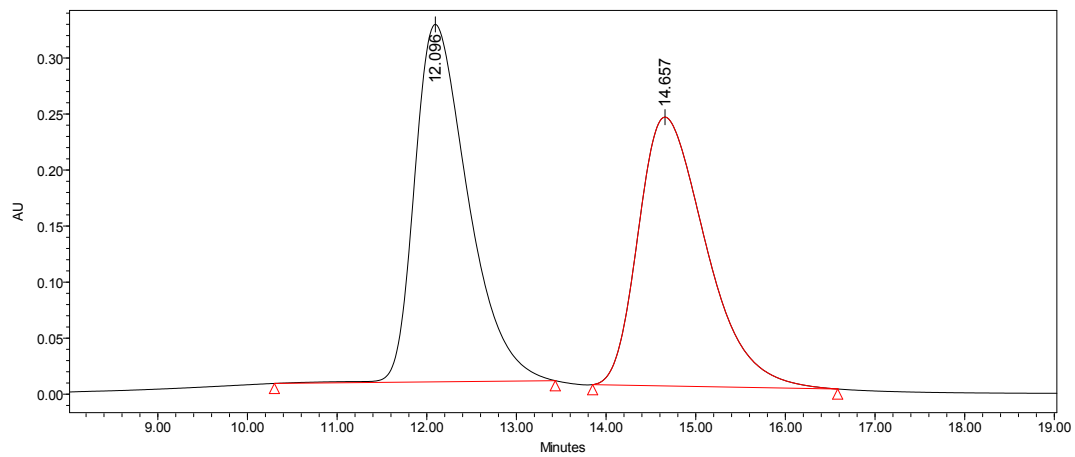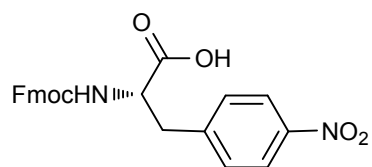

**L-5ai**

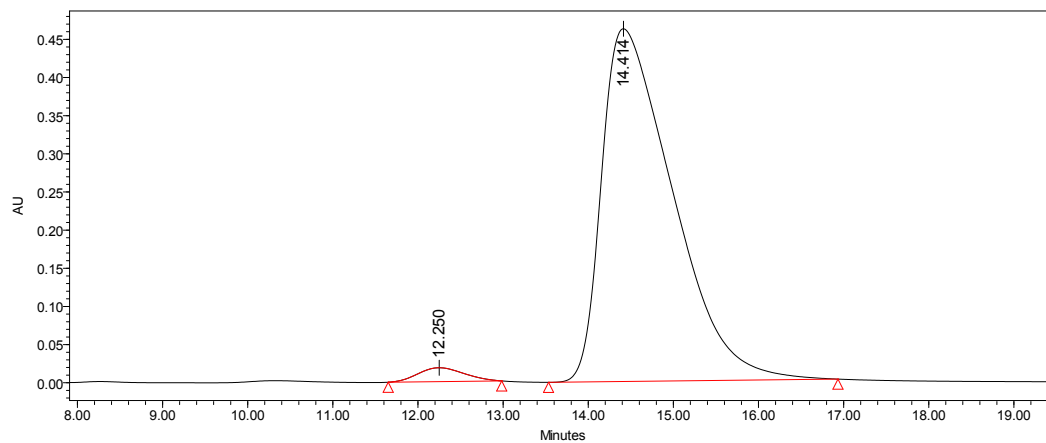

Area% report for 5ai:

|   | Retention Time | Area     | % Area | Height | % Height |
|---|----------------|----------|--------|--------|----------|
| 1 | 12.250         | 684089   | 2.49   | 16770  | 3.49     |
| 2 | 14.414         | 26801076 | 97.51  | 463730 | 96.51    |

Figure 1. <sup>1</sup>H NMR and <sup>13</sup>C NMR spectra of 3aa

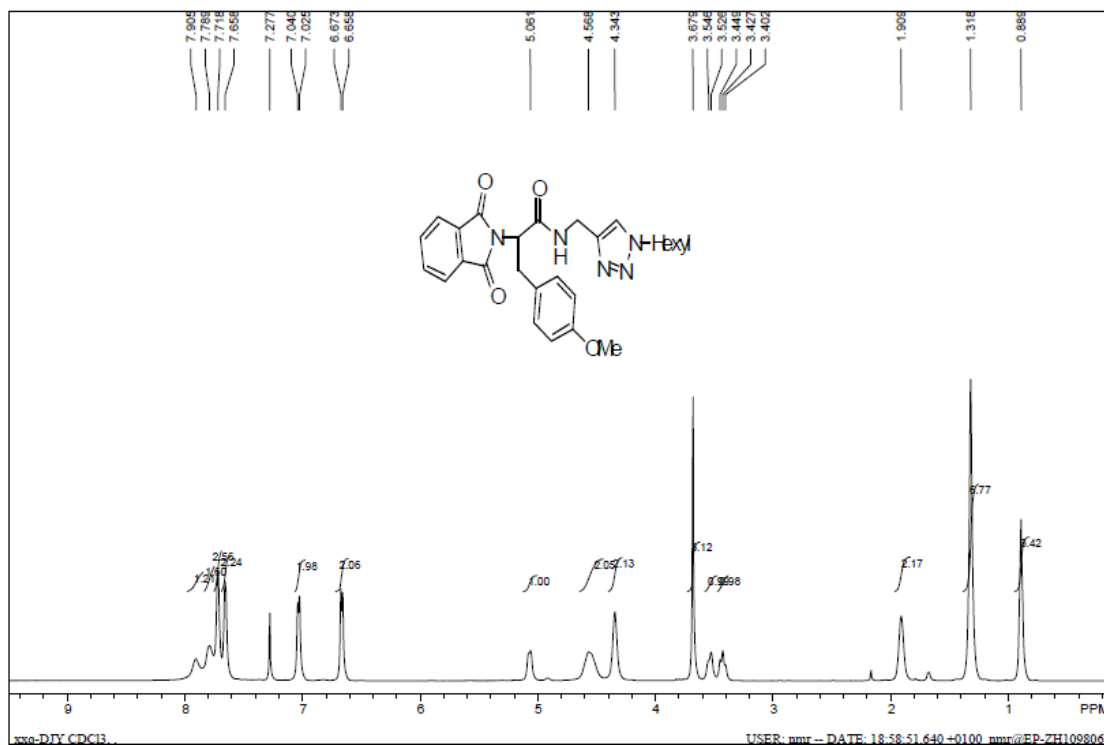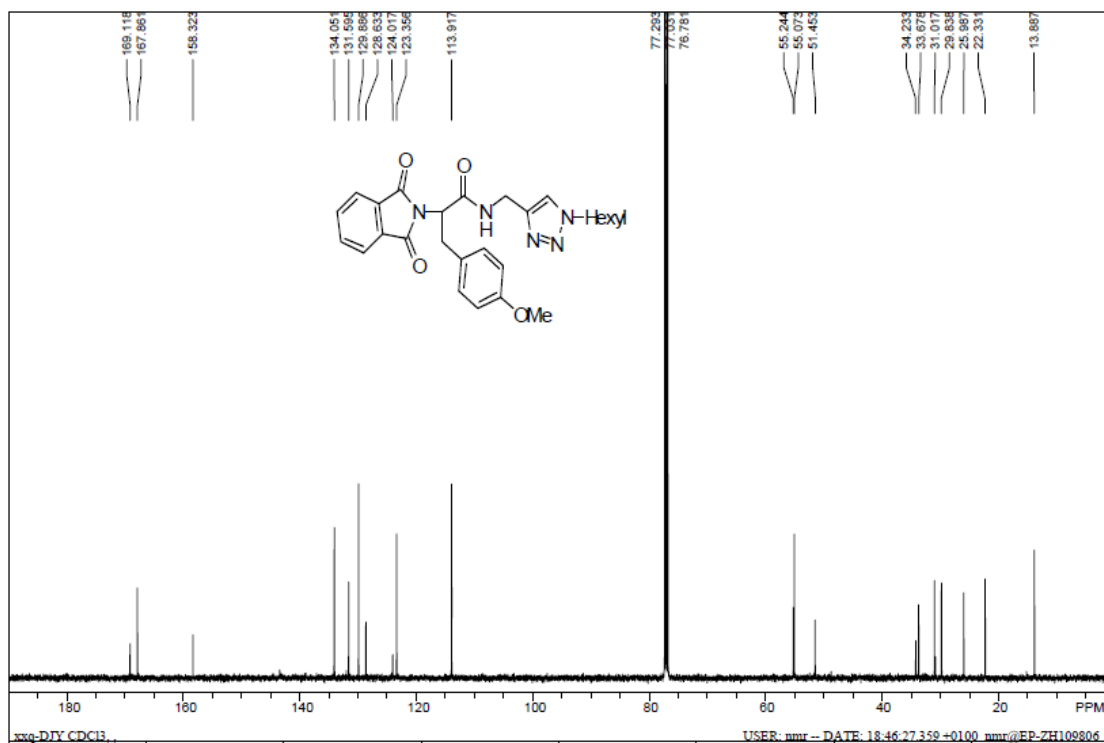

Figure 2. <sup>1</sup>H NMR and <sup>13</sup>C NMR spectra of 3ab

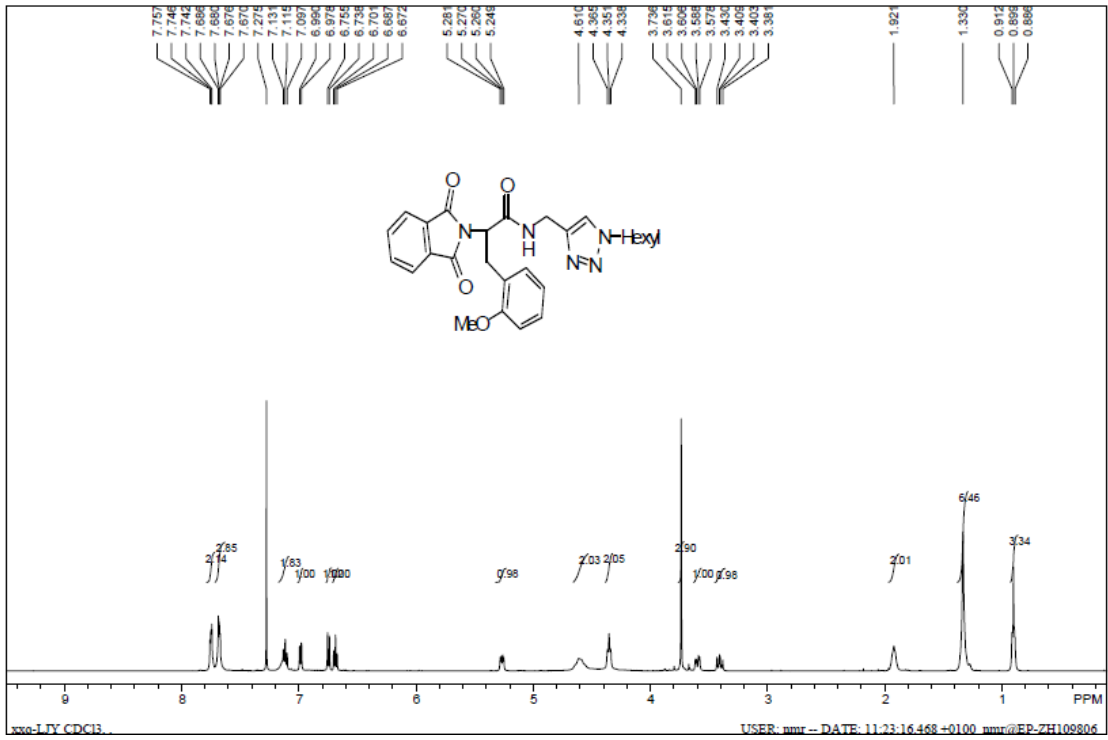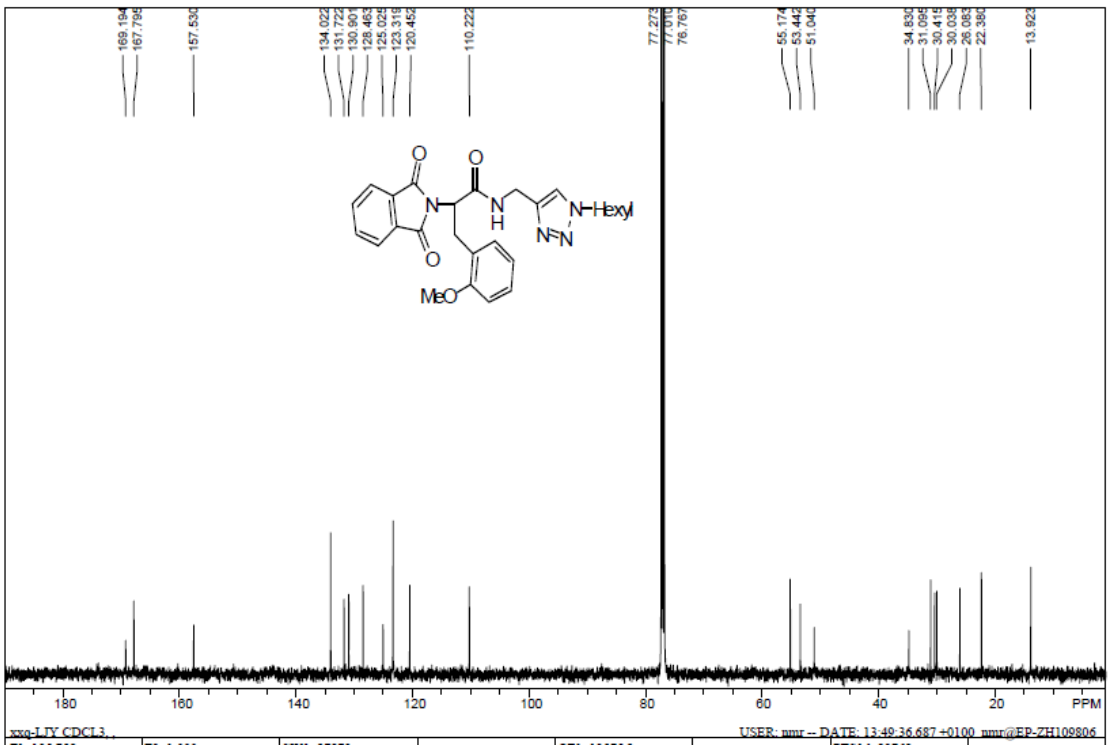

Figure 3.  $^1\text{H}$  NMR and  $^{13}\text{C}$  NMR spectra of 3ac

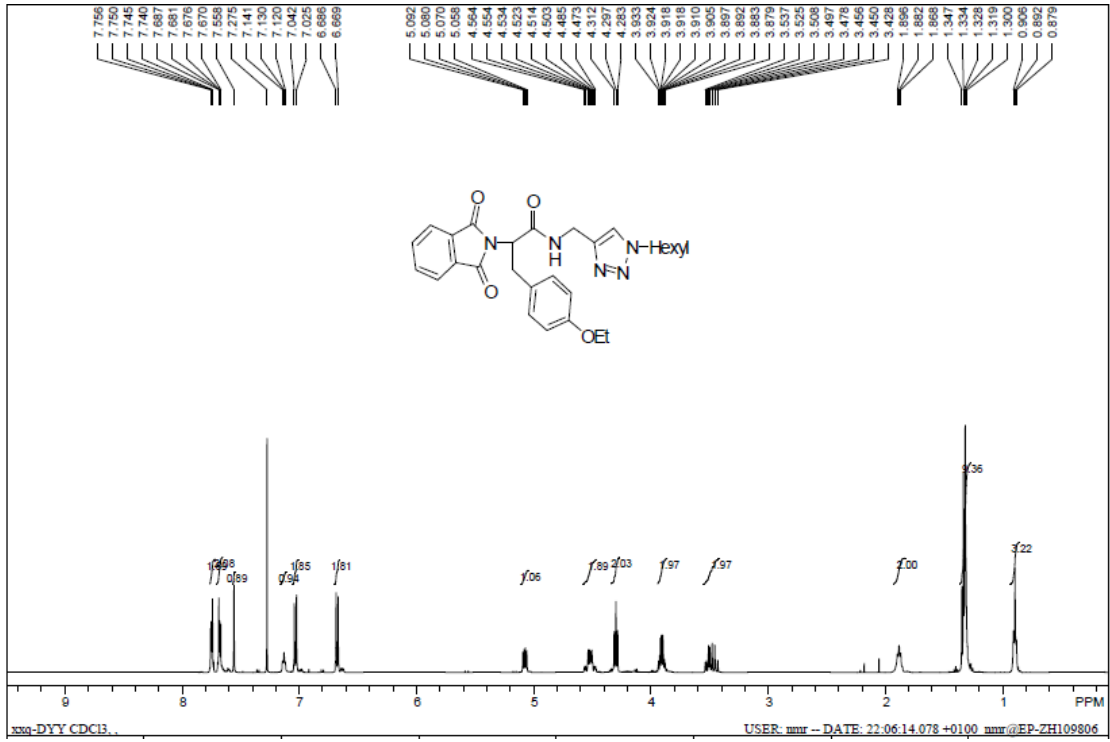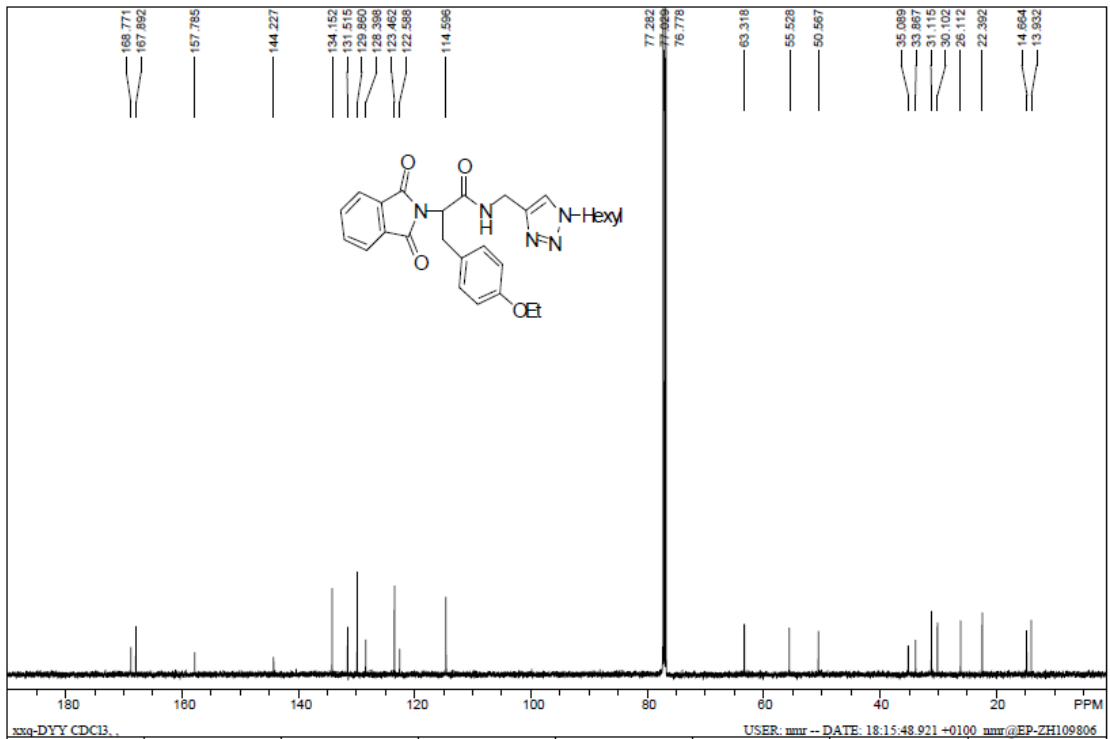

Figure 4. <sup>1</sup>H NMR and <sup>13</sup>C NMR spectra of 3ad

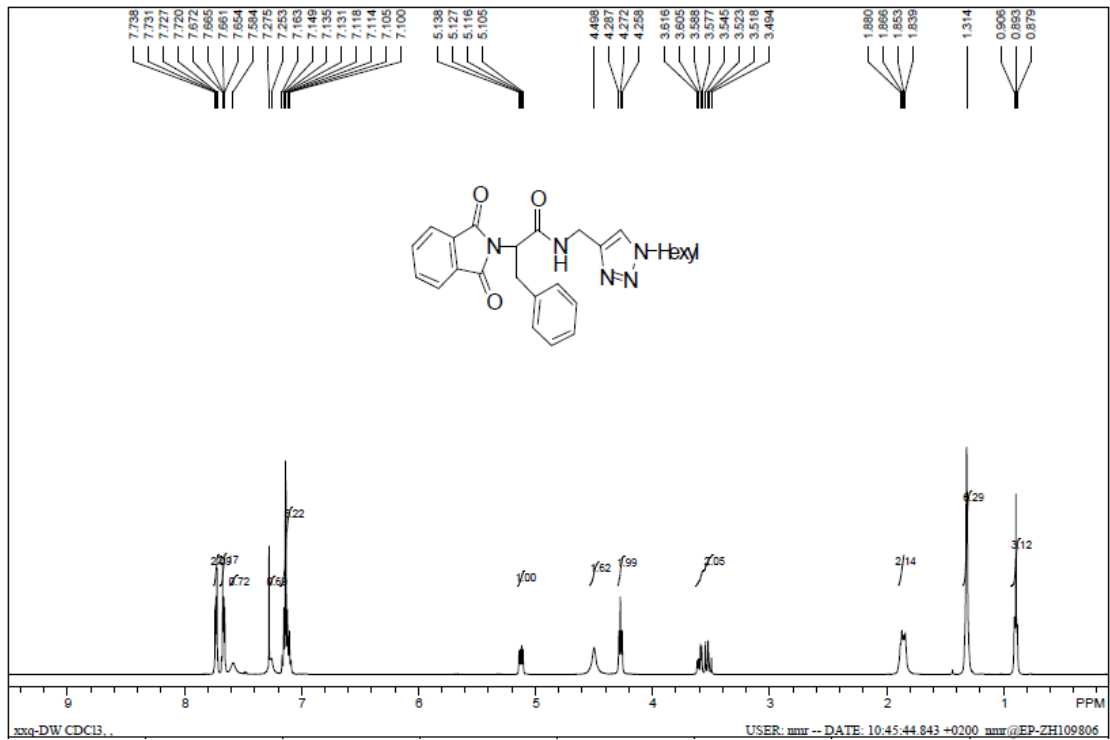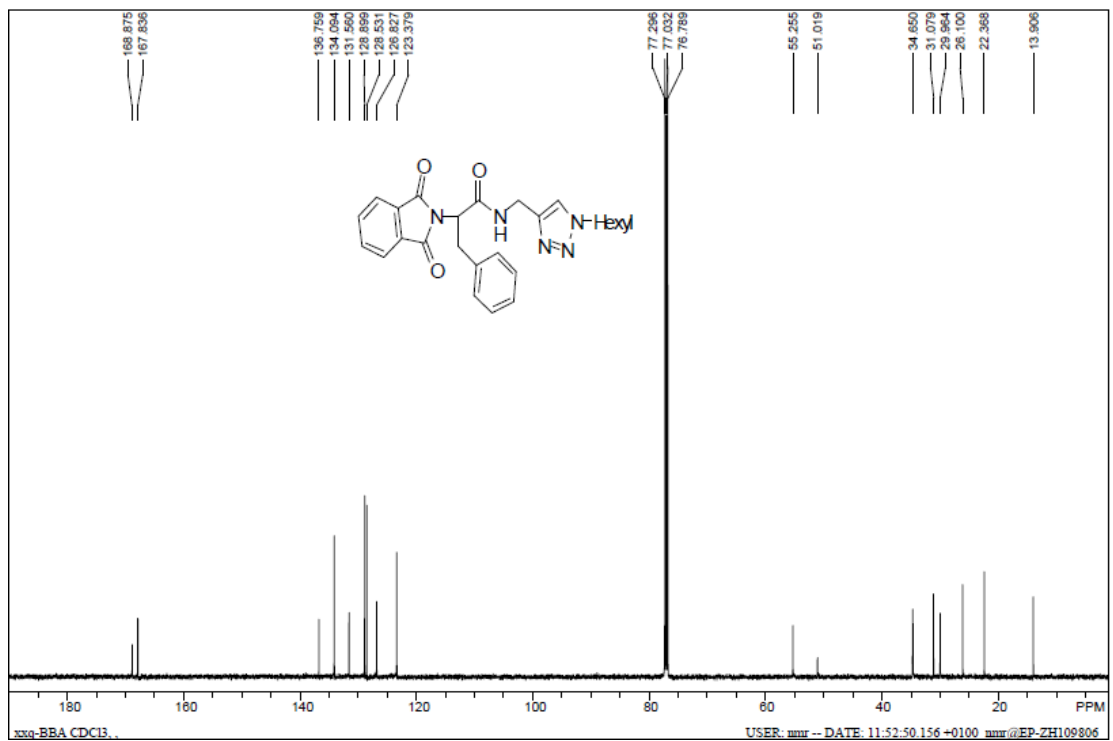

Figure 5.  $^1\text{H}$  NMR,  $^{13}\text{C}$  NMR and  $^{19}\text{F}$  NMR spectra of 3ae

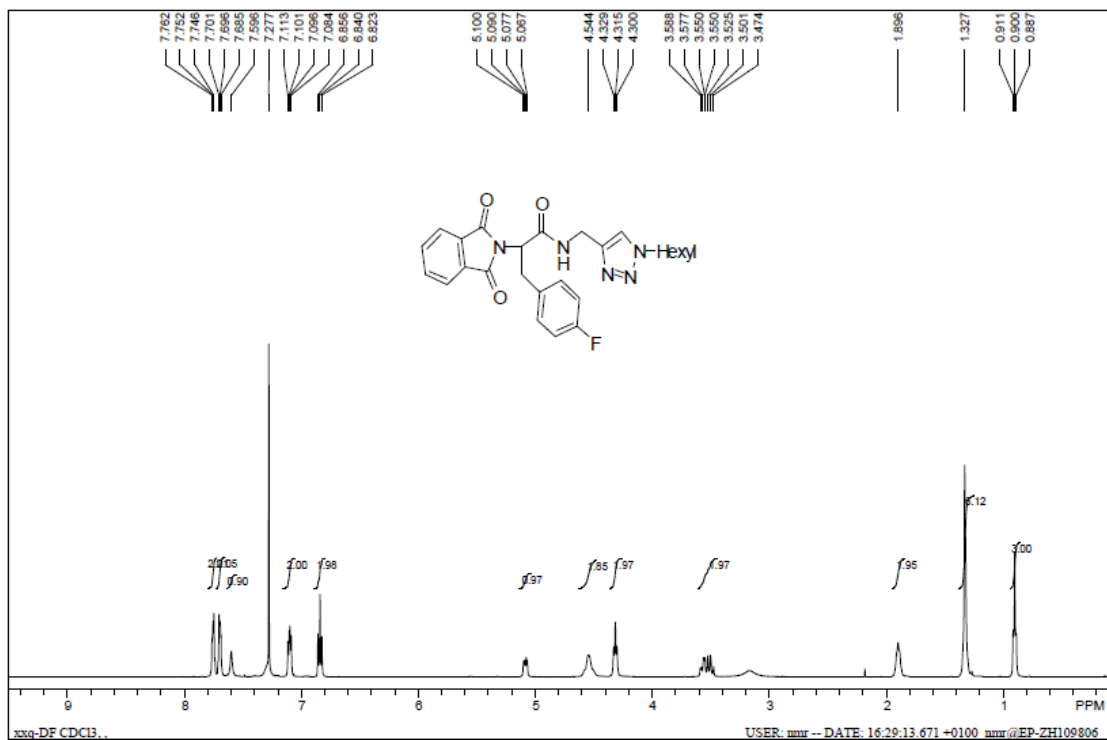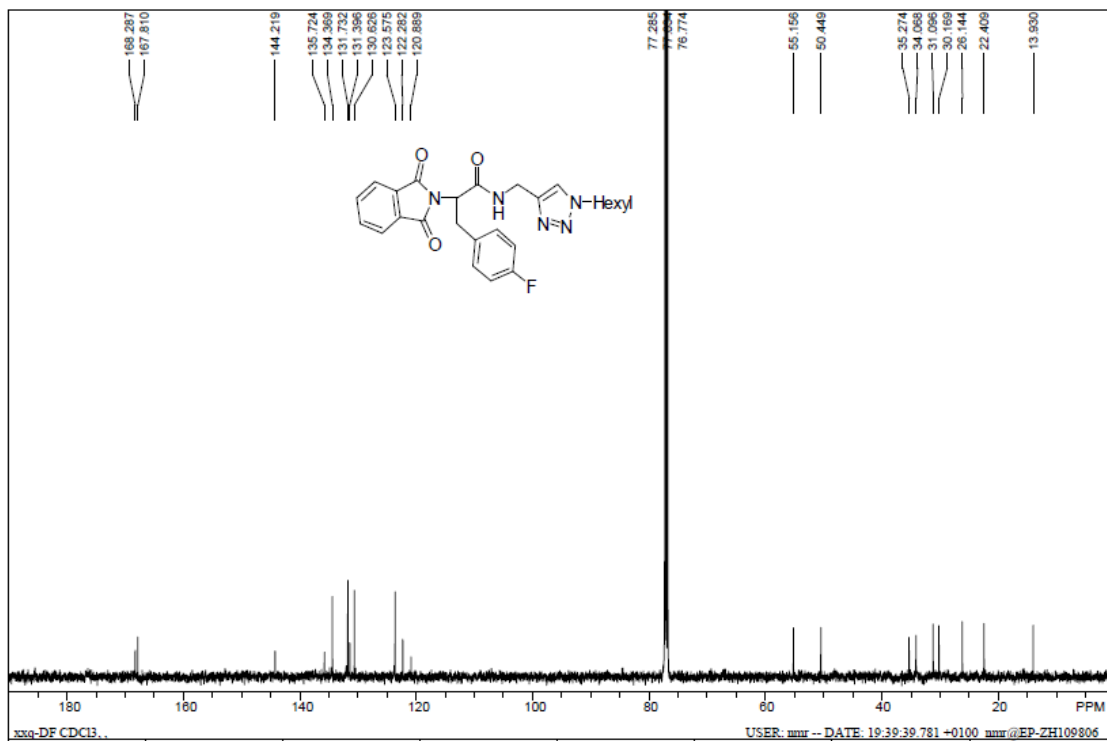

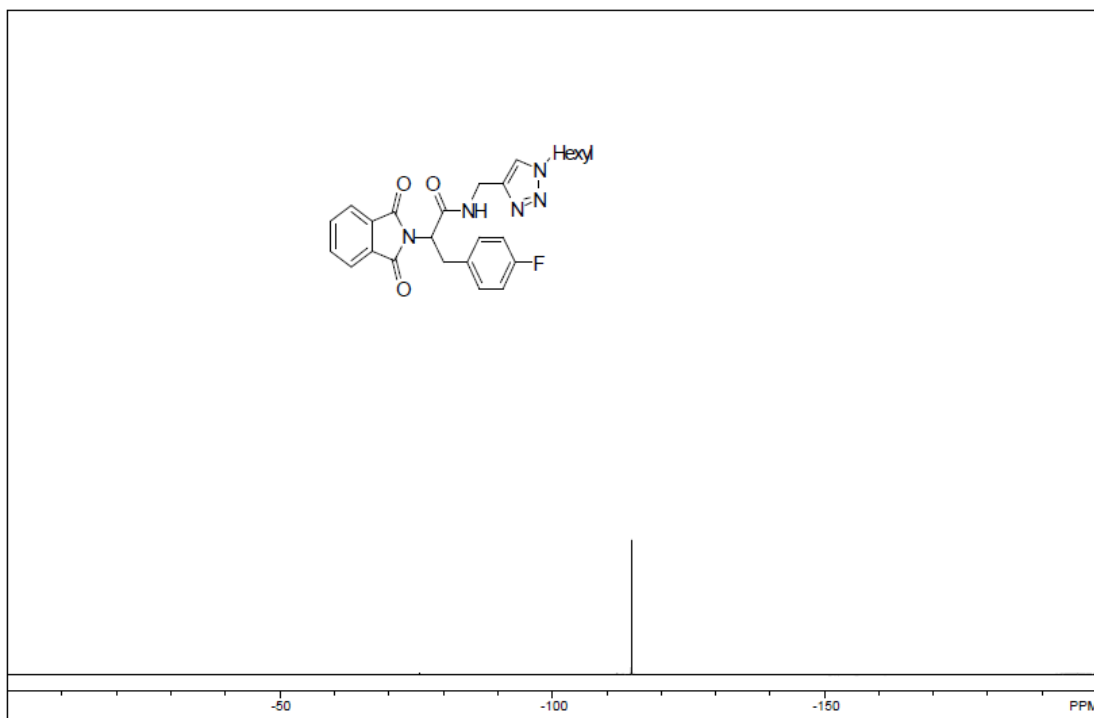

Figure 6.  $^1\text{H}$  NMR and  $^{13}\text{C}$  NMR spectra of 3af

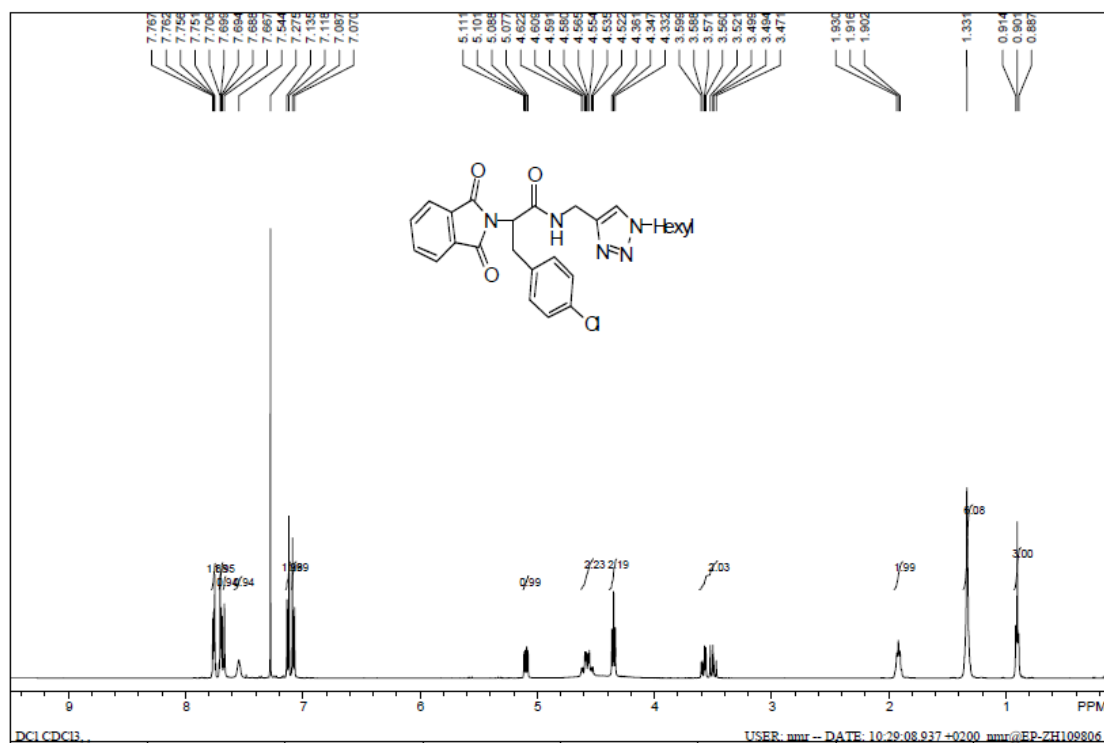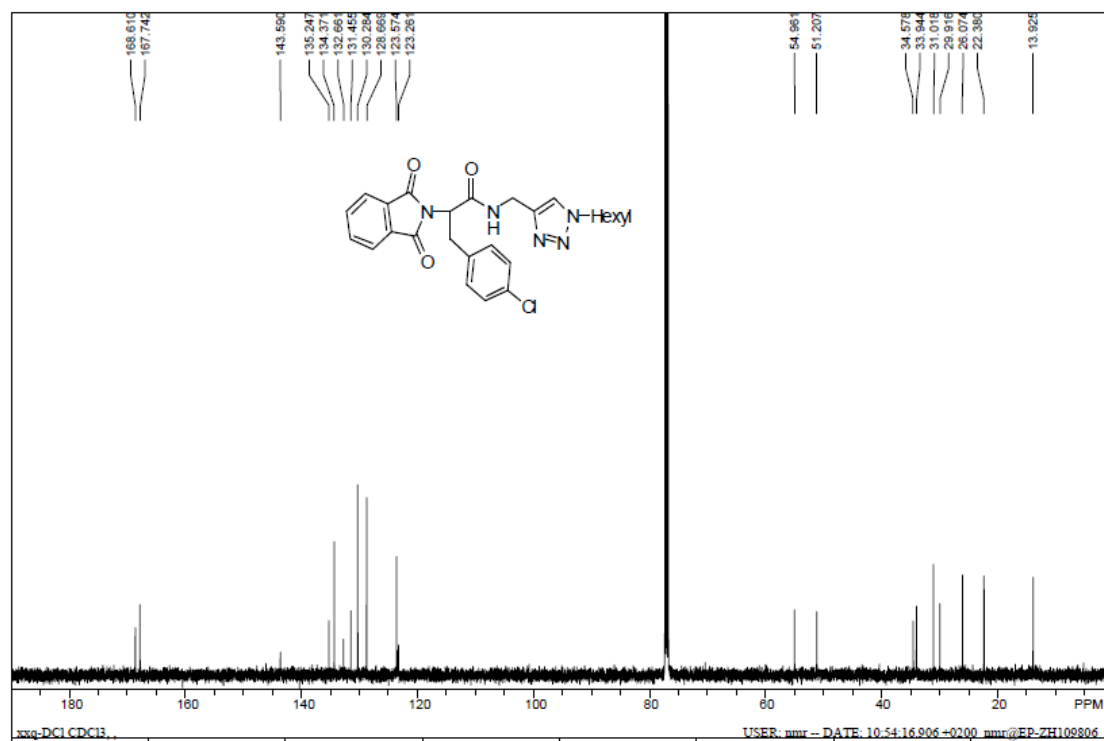



Figure 7. <sup>1</sup>H NMR and <sup>13</sup>C NMR spectra of 3ag

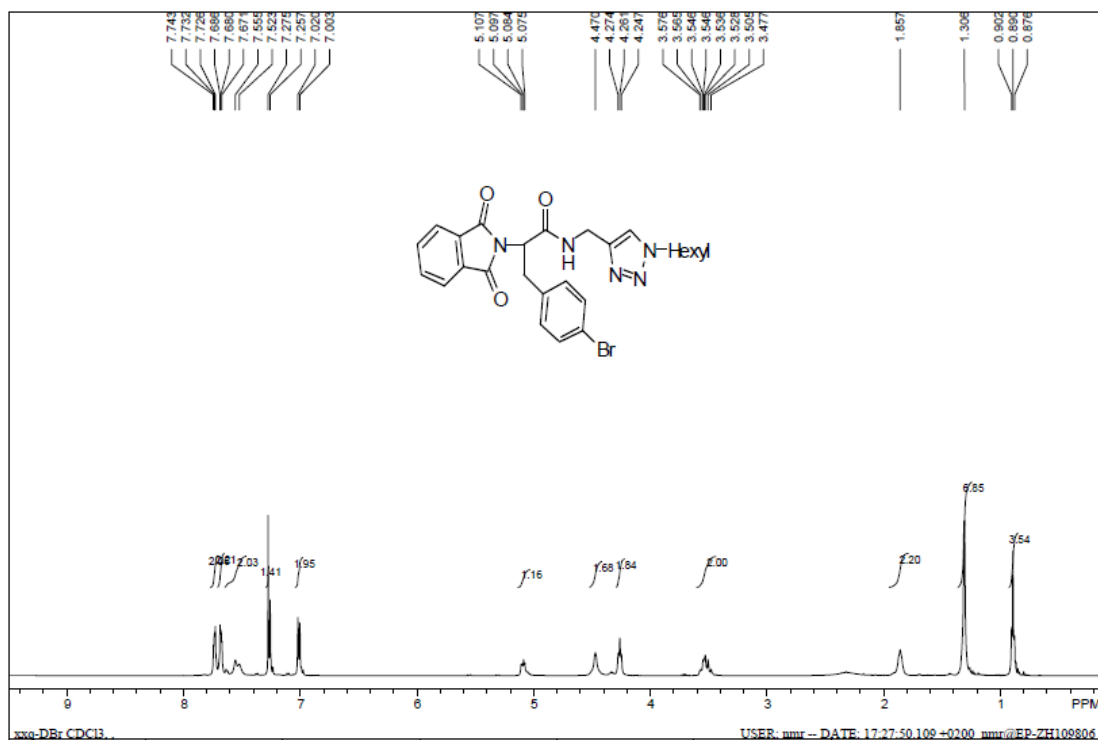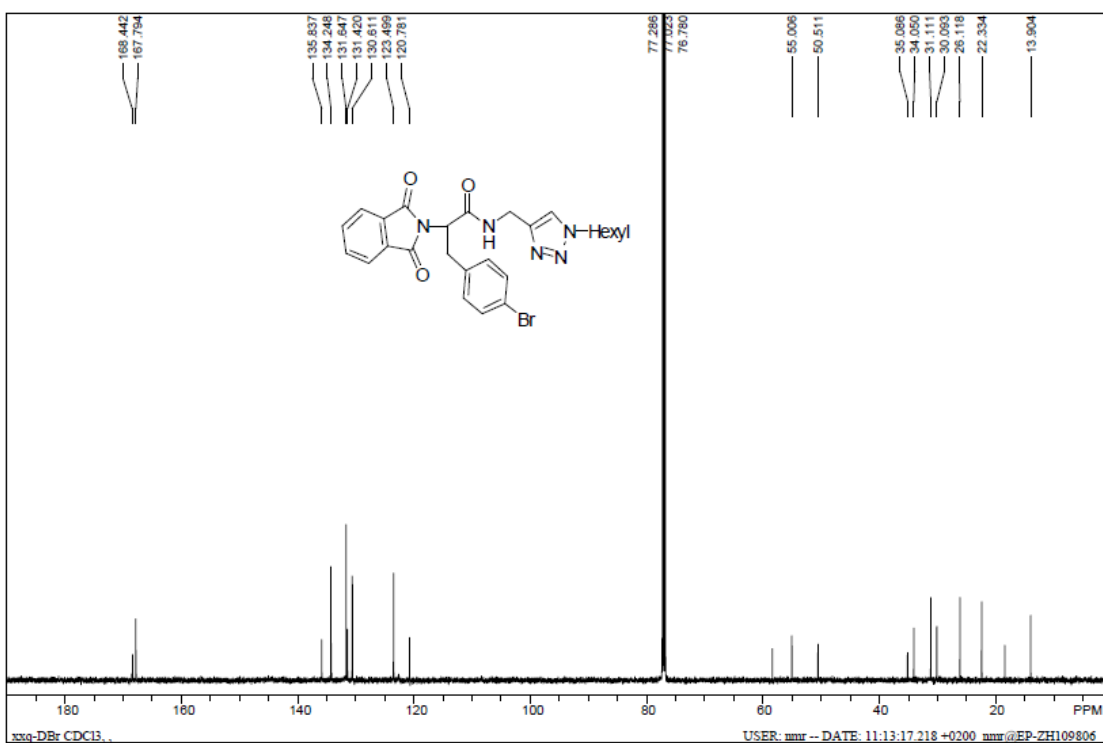

Figure 8.  $^1\text{H}$  NMR,  $^{13}\text{C}$  NMR and  $^{19}\text{F}$  NMR spectra of 3ah

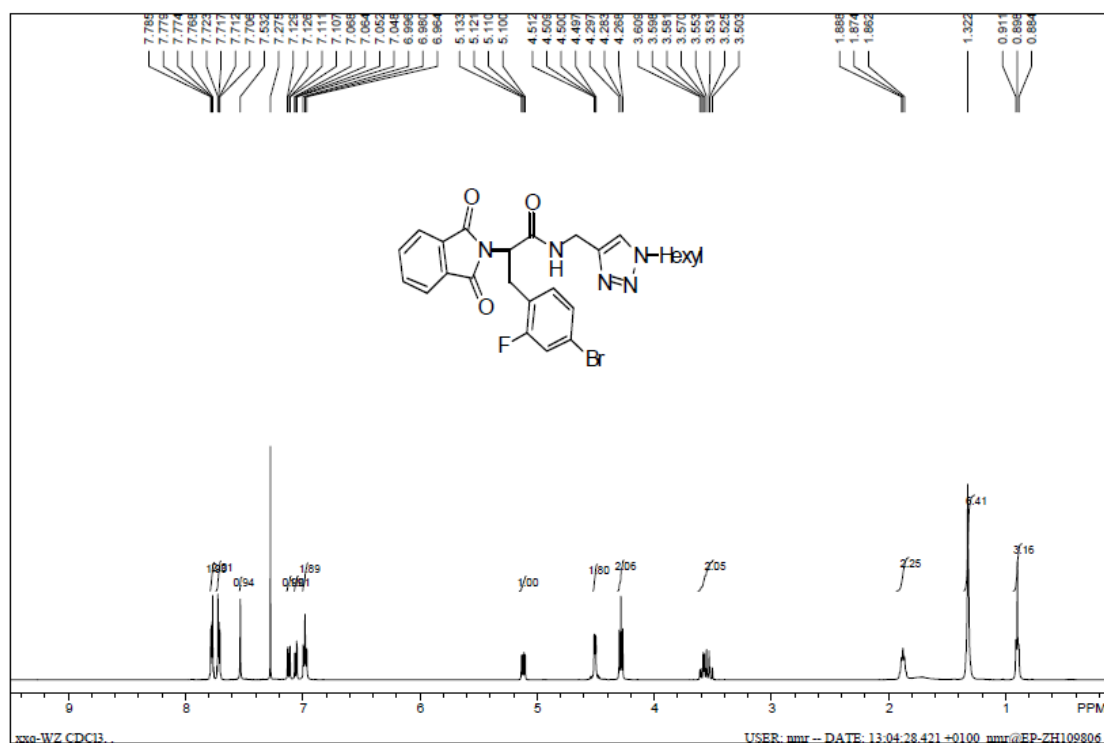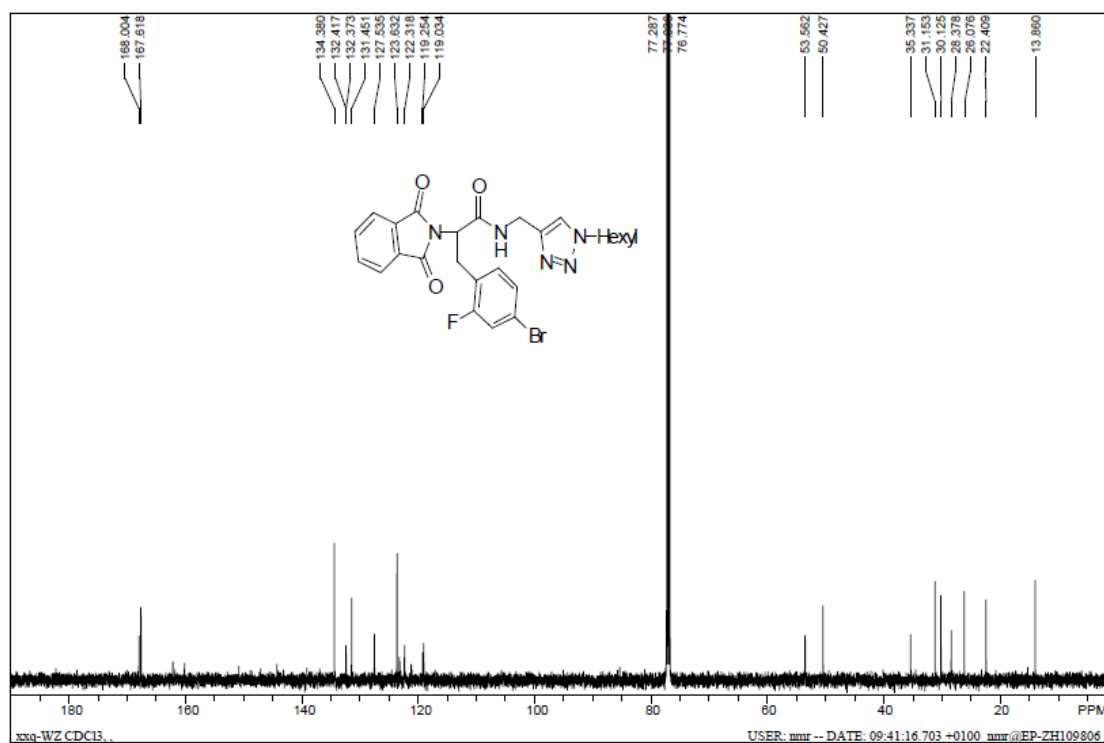

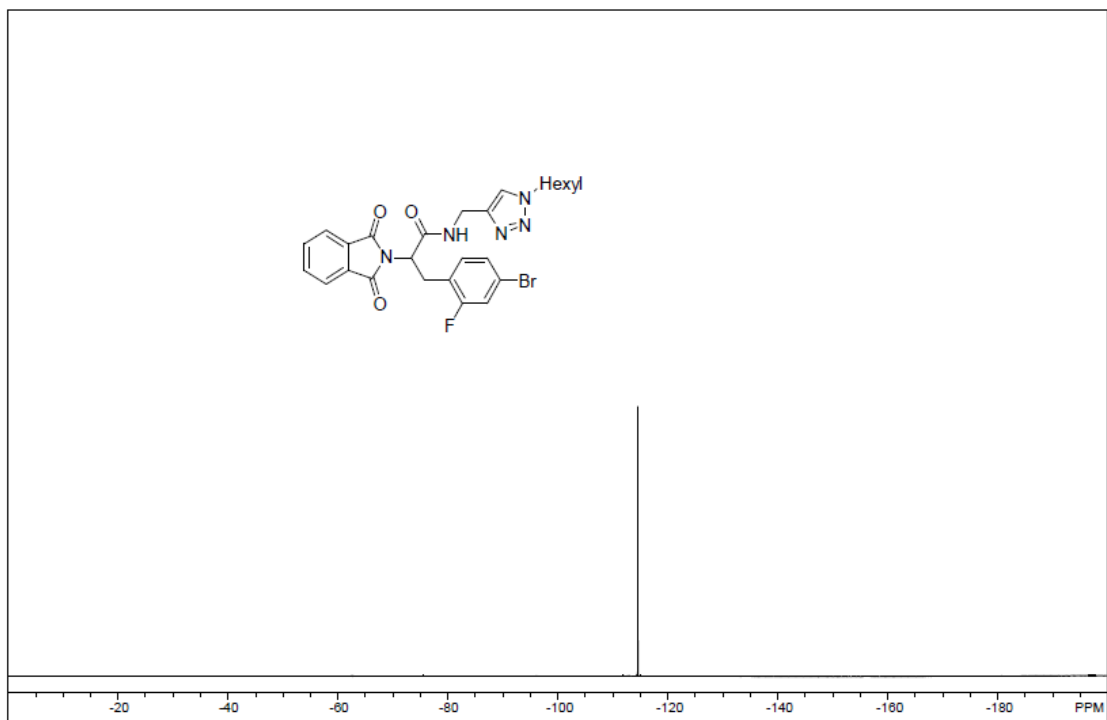

Figure 9. <sup>1</sup>H NMR and <sup>13</sup>C NMR spectra of 3ai

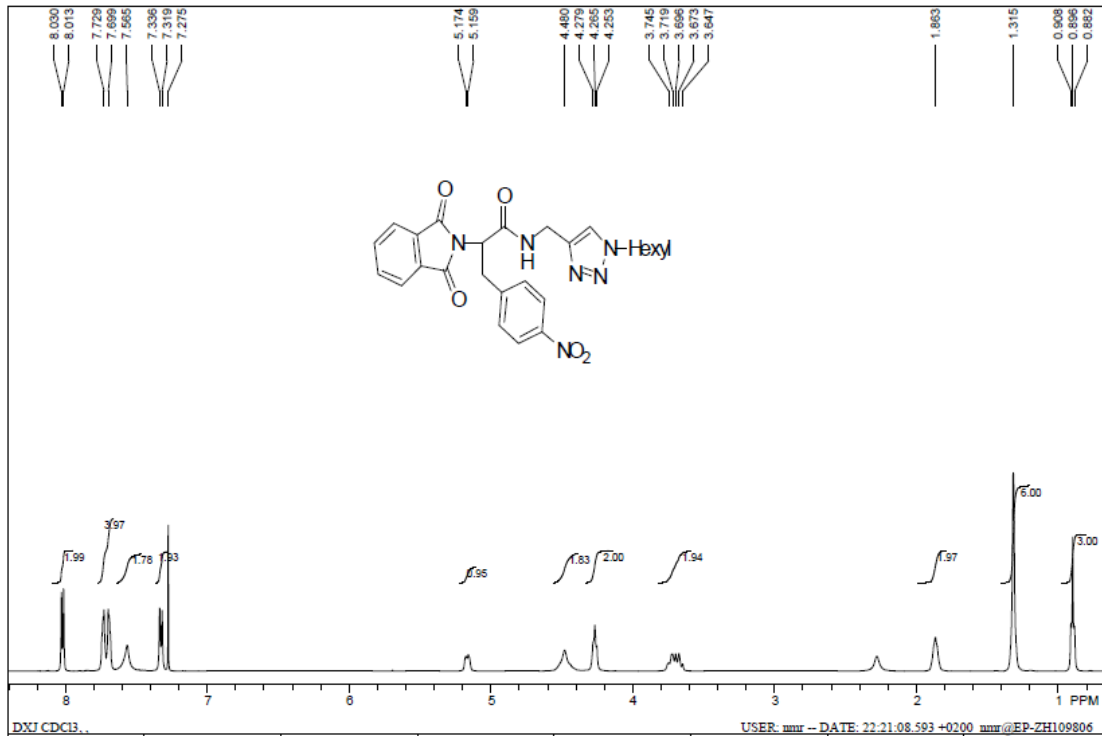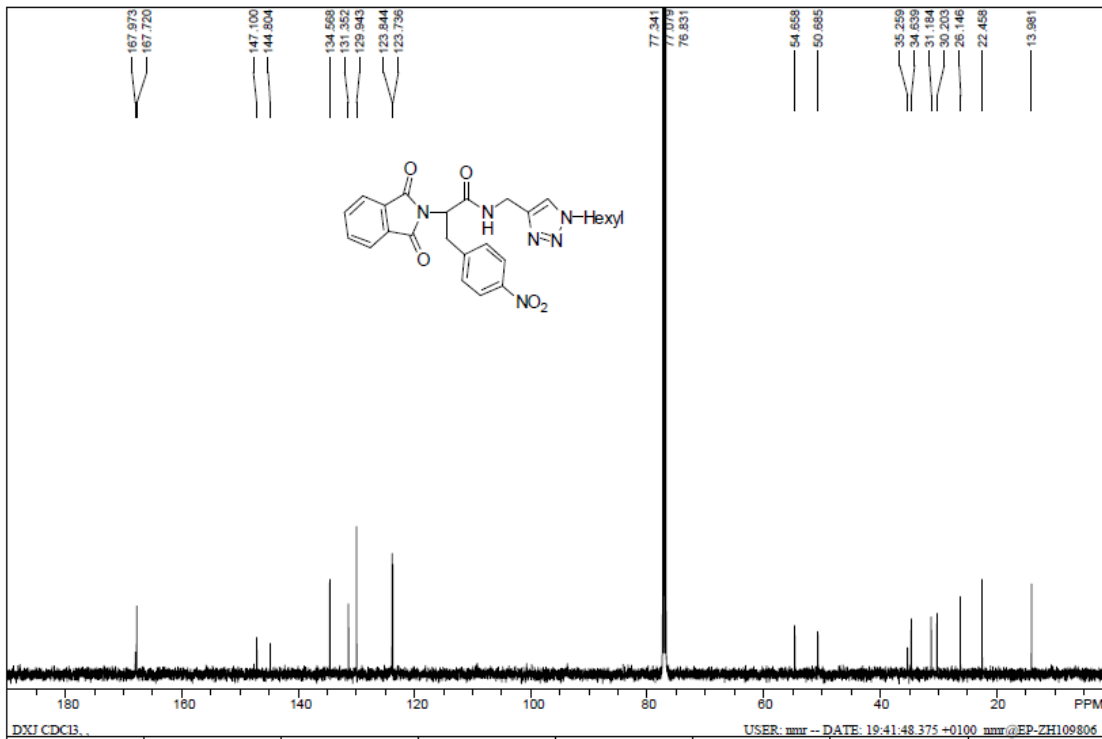

Figure 10.  $^1\text{H}$  NMR and  $^{13}\text{C}$  NMR spectra of 3aj

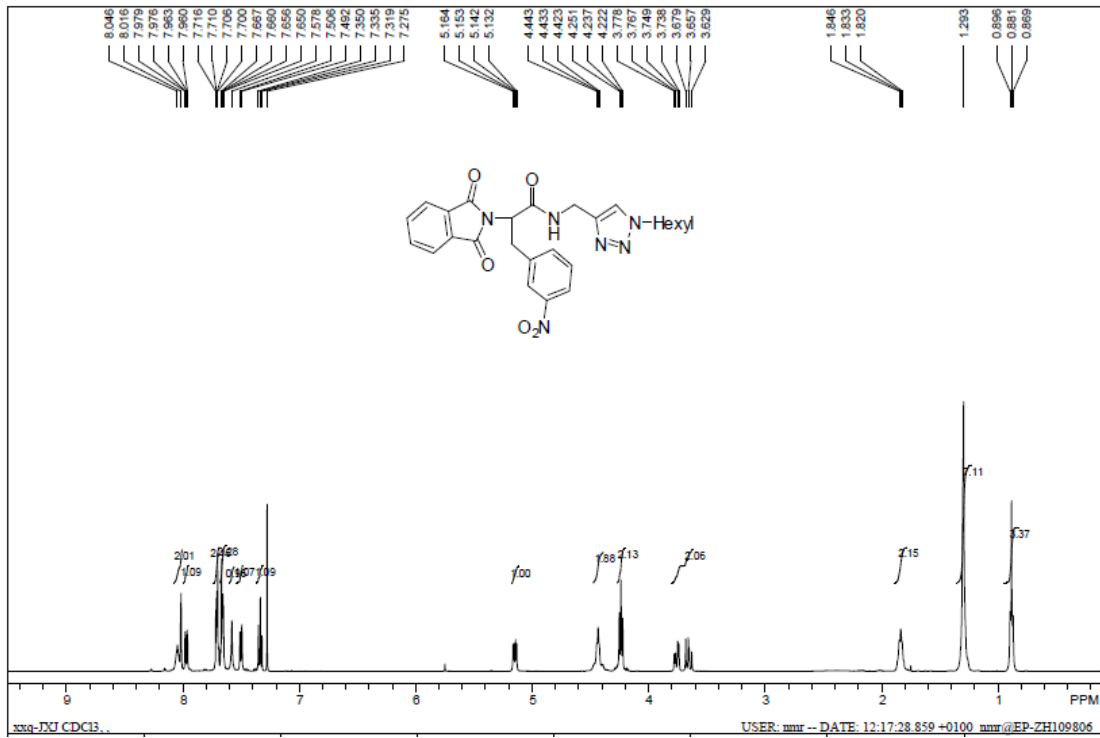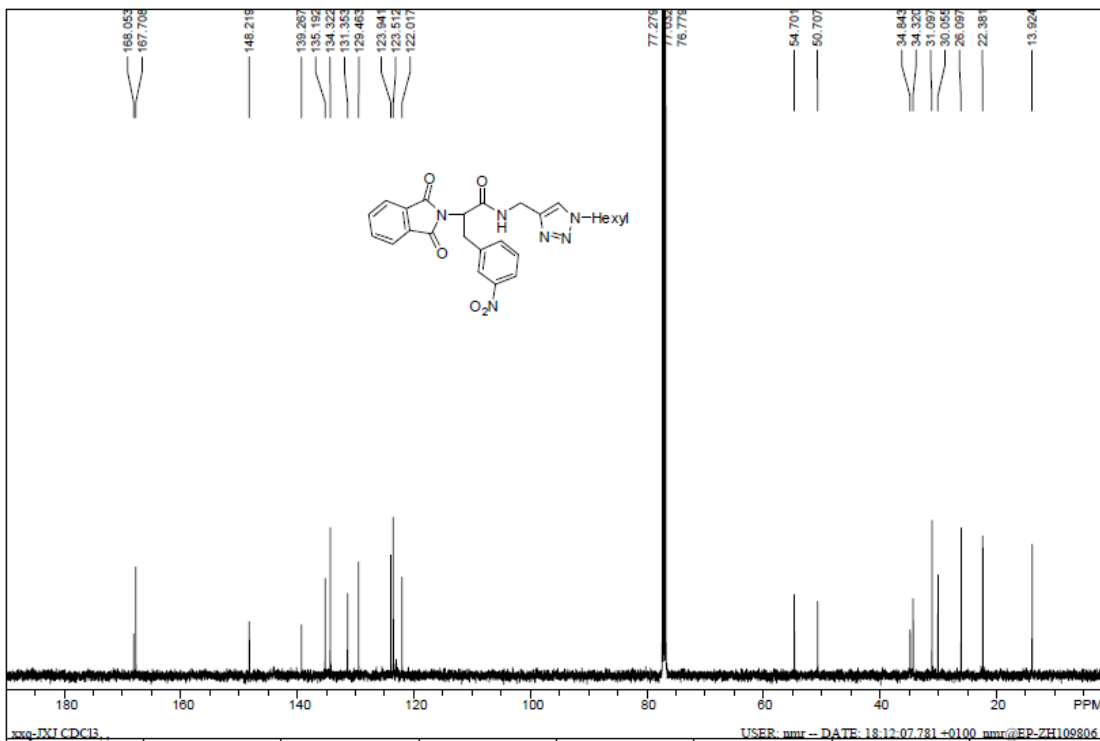

Figure 11.  $^1\text{H}$  NMR and  $^{13}\text{C}$  NMR spectra of 3ak

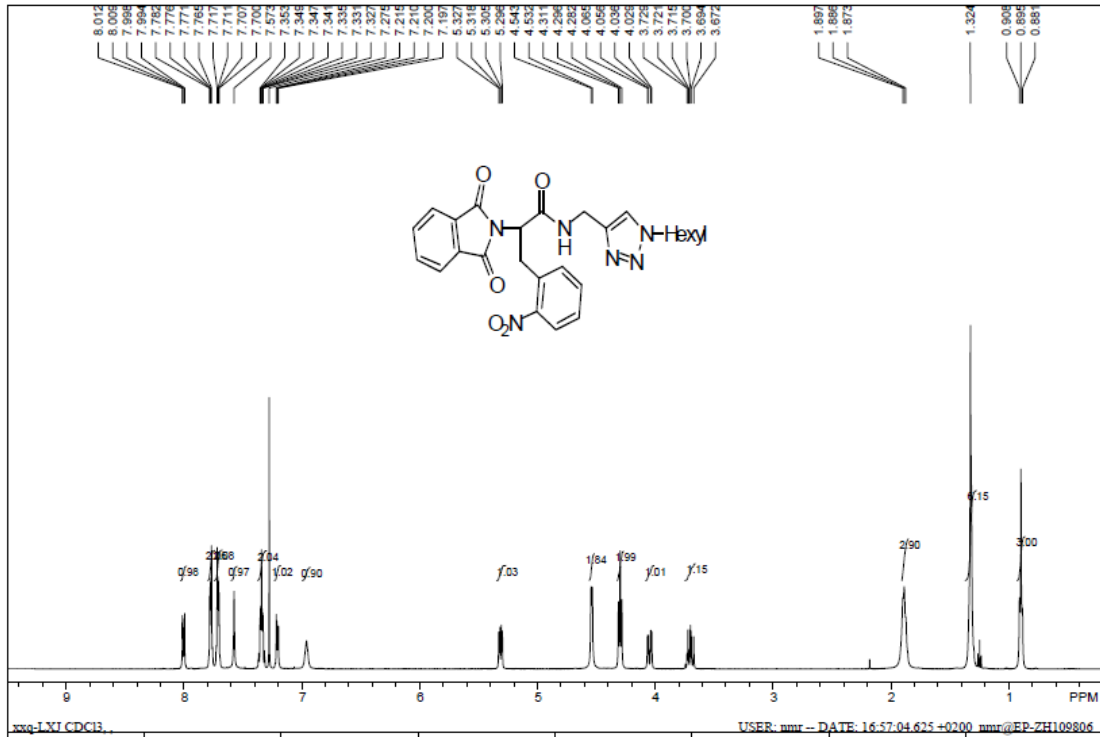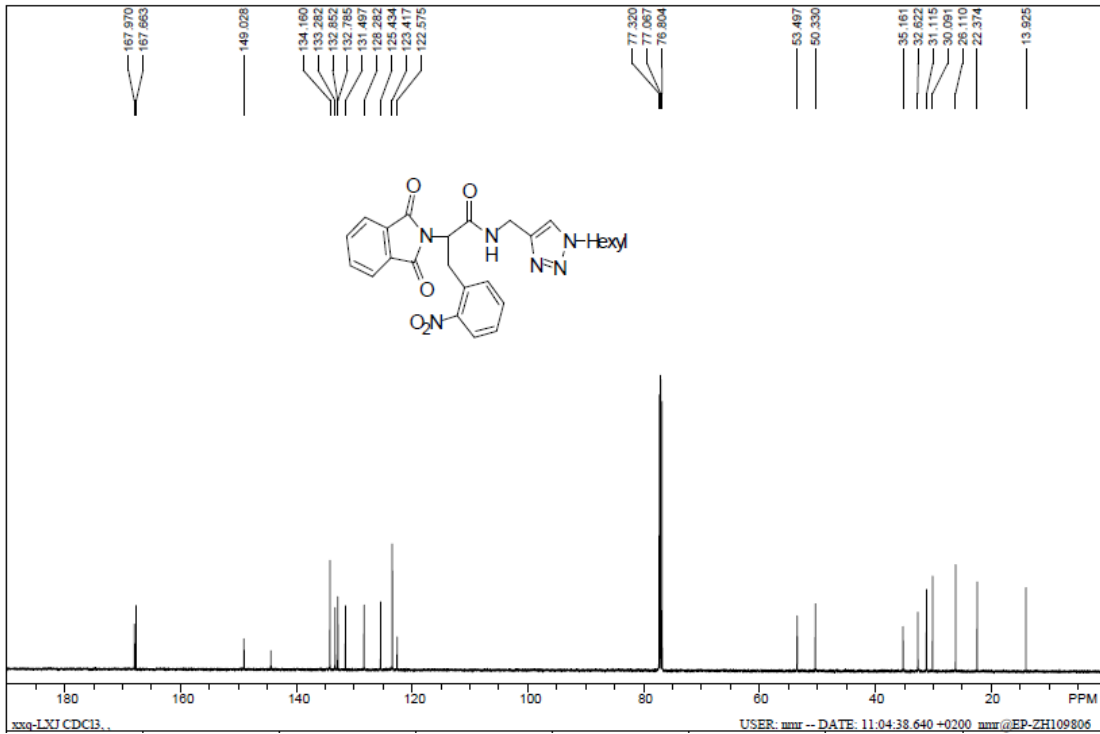

Figure 12. <sup>1</sup>H NMR and <sup>13</sup>C NMR spectra of 3al

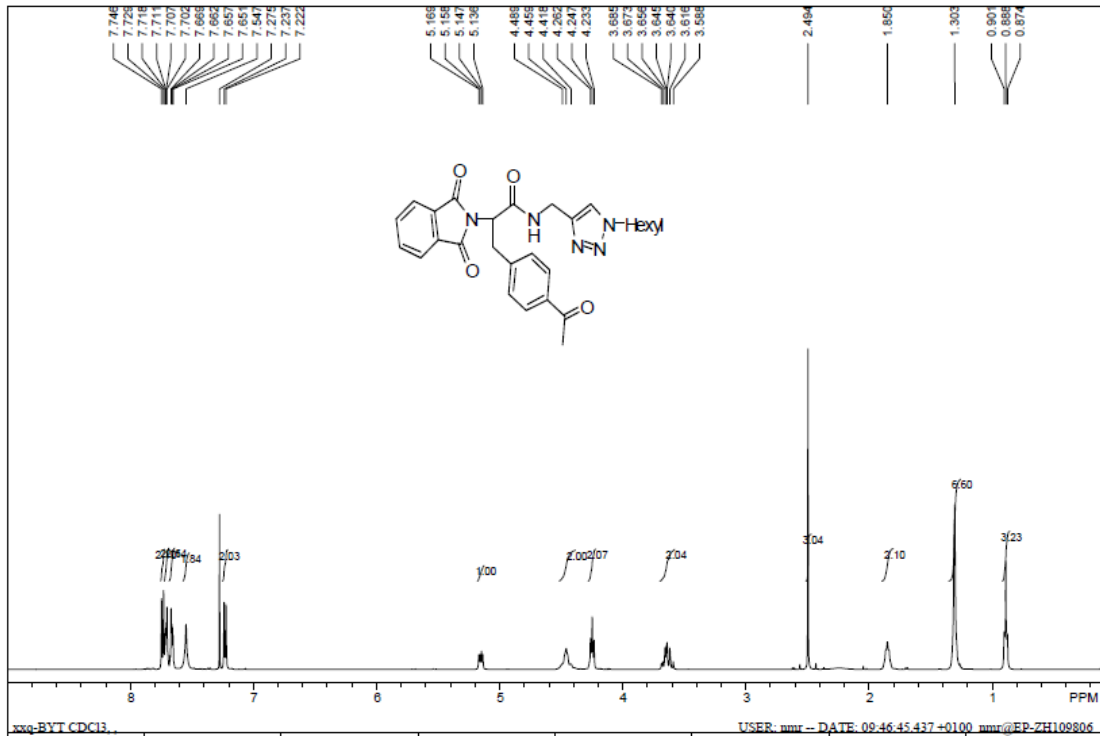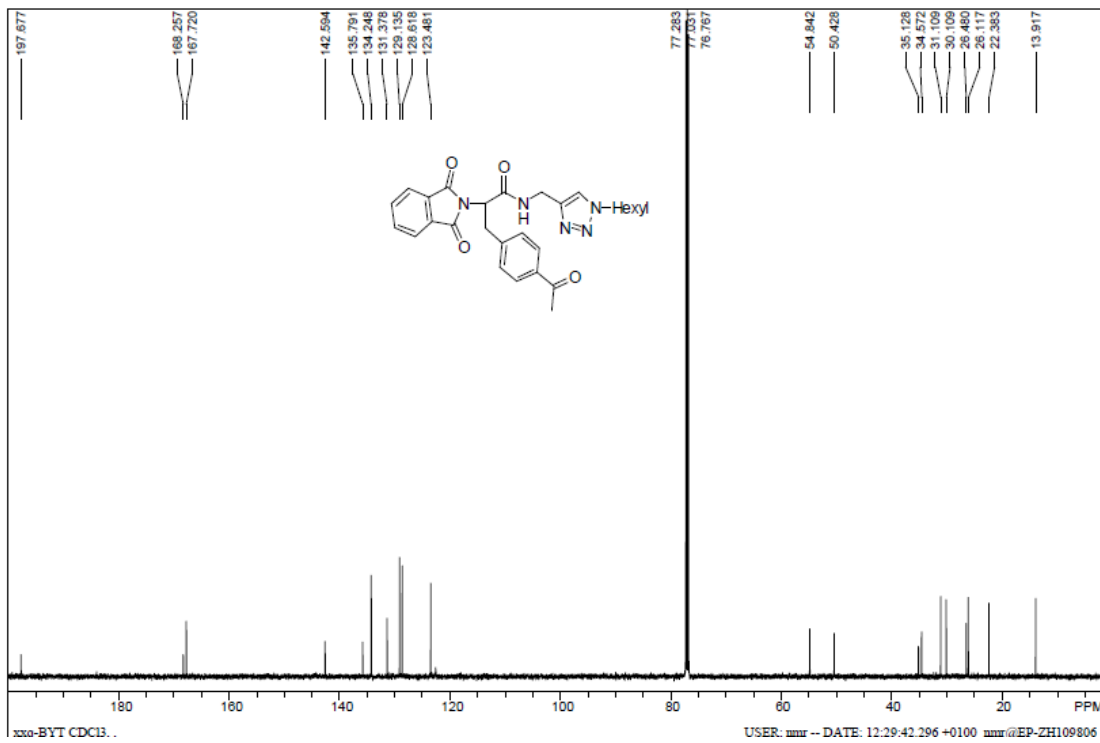

Figure 13. <sup>1</sup>H NMR, <sup>13</sup>C NMR and <sup>19</sup>F NMR spectra of 3am

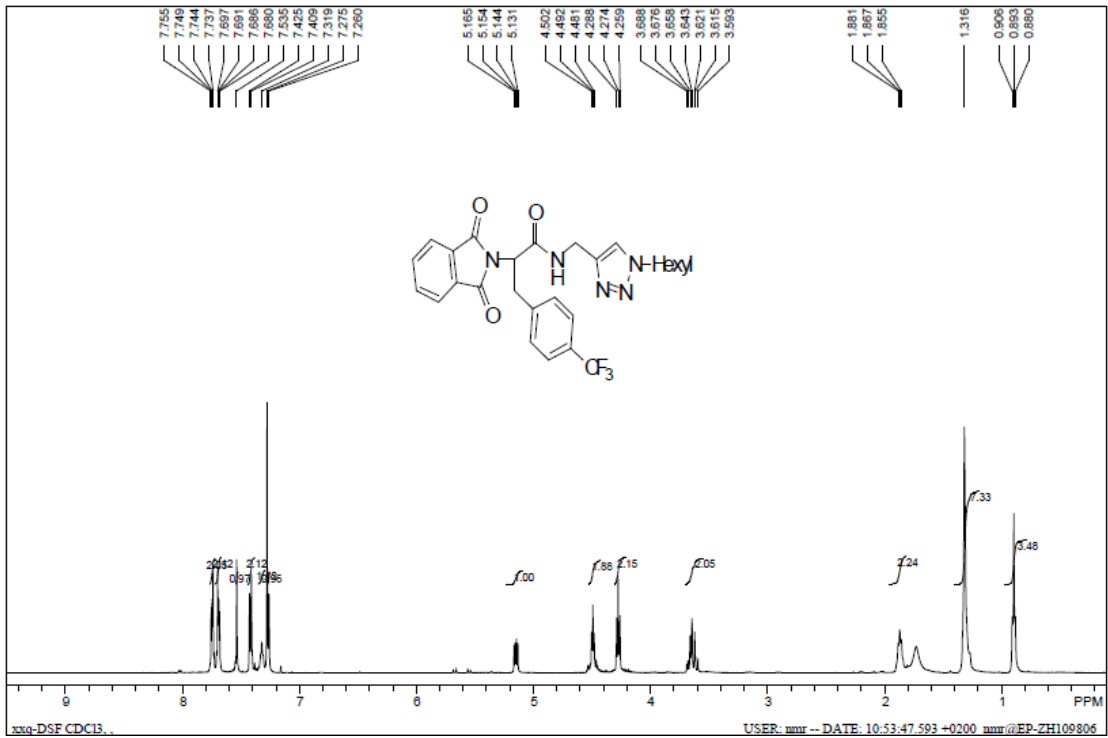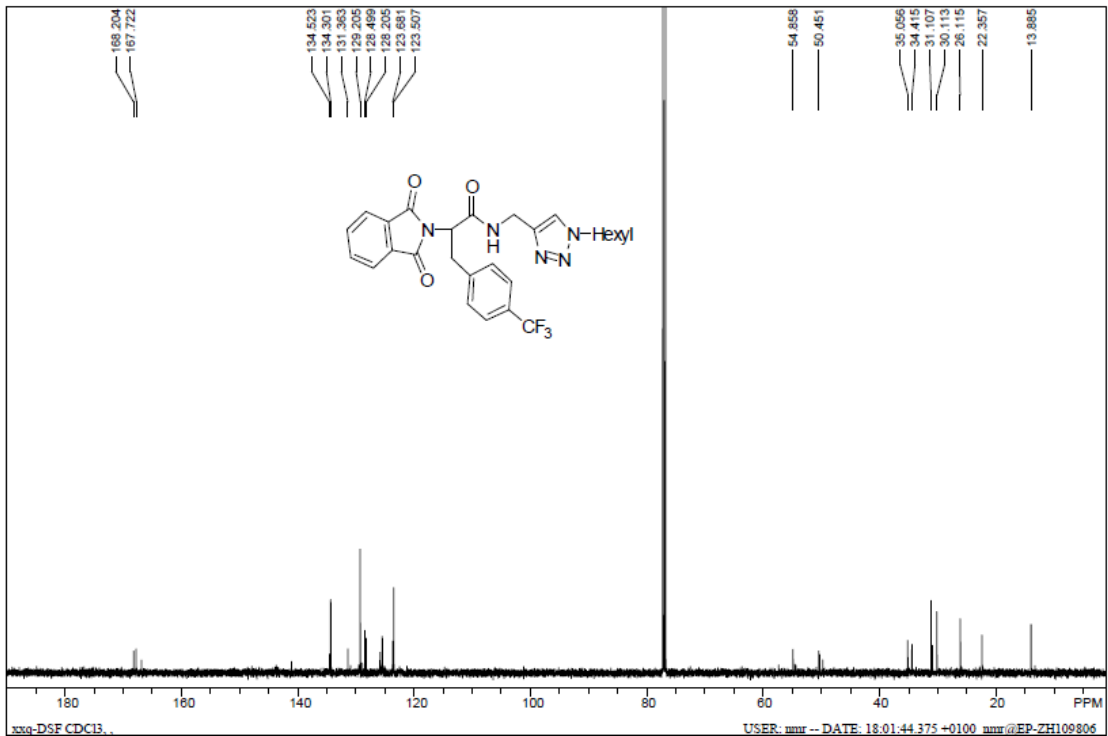



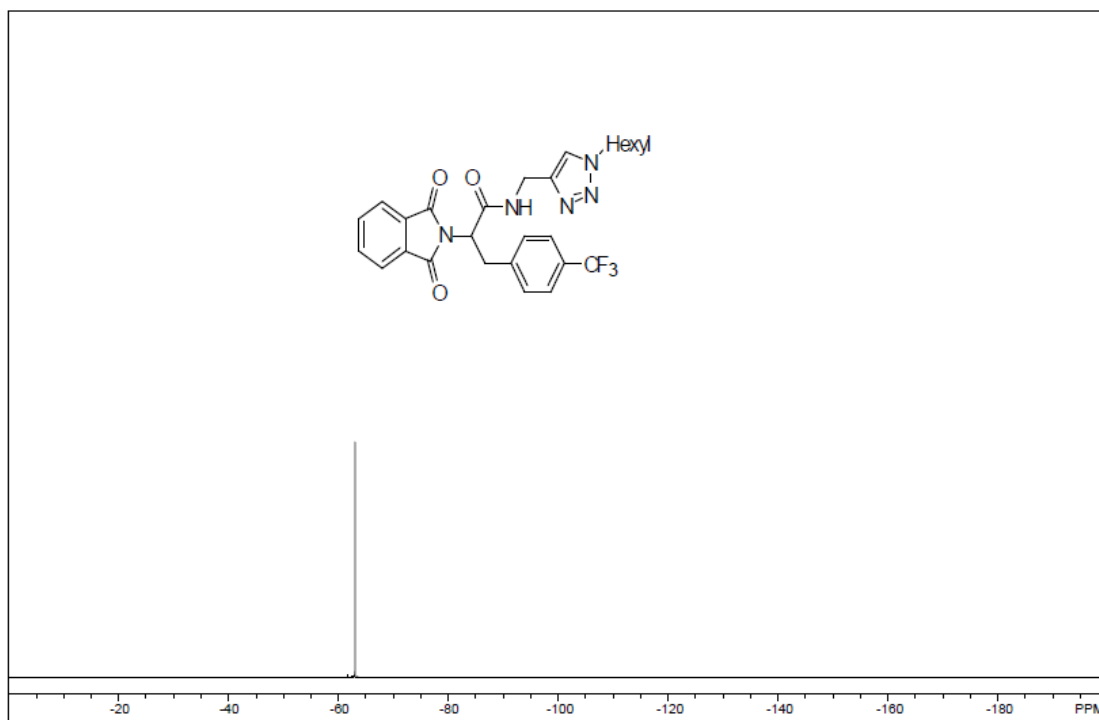

Figure 14.  $^1\text{H}$  NMR and  $^{13}\text{C}$  NMR spectra of 3an

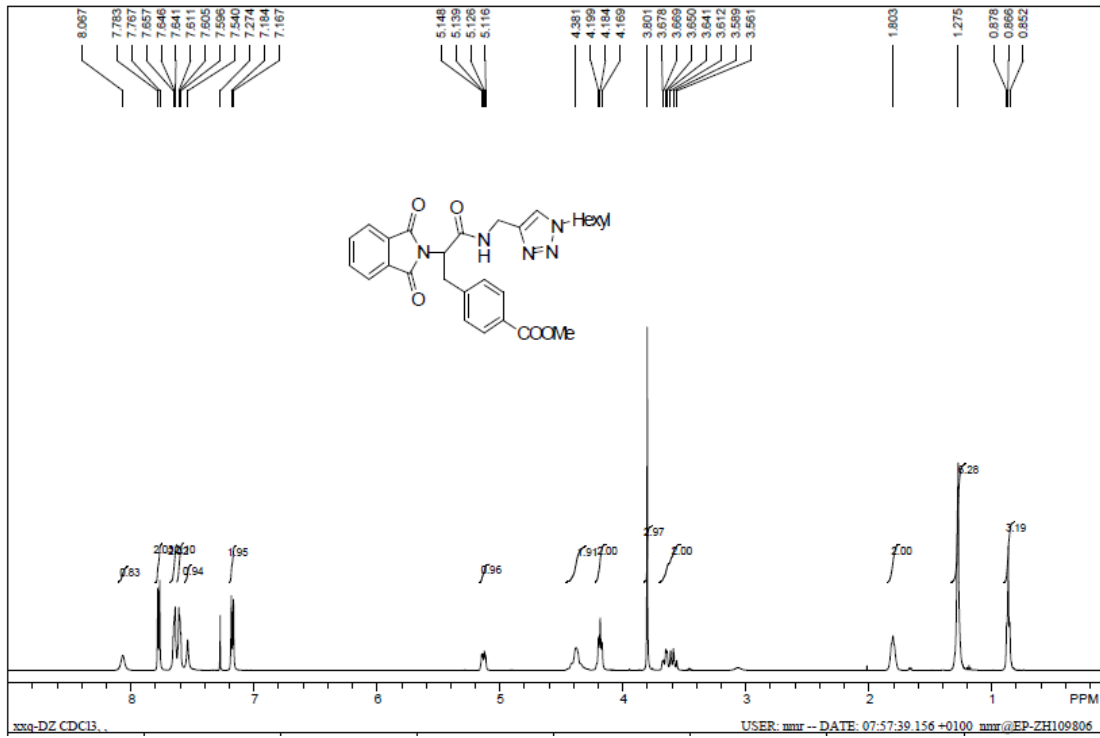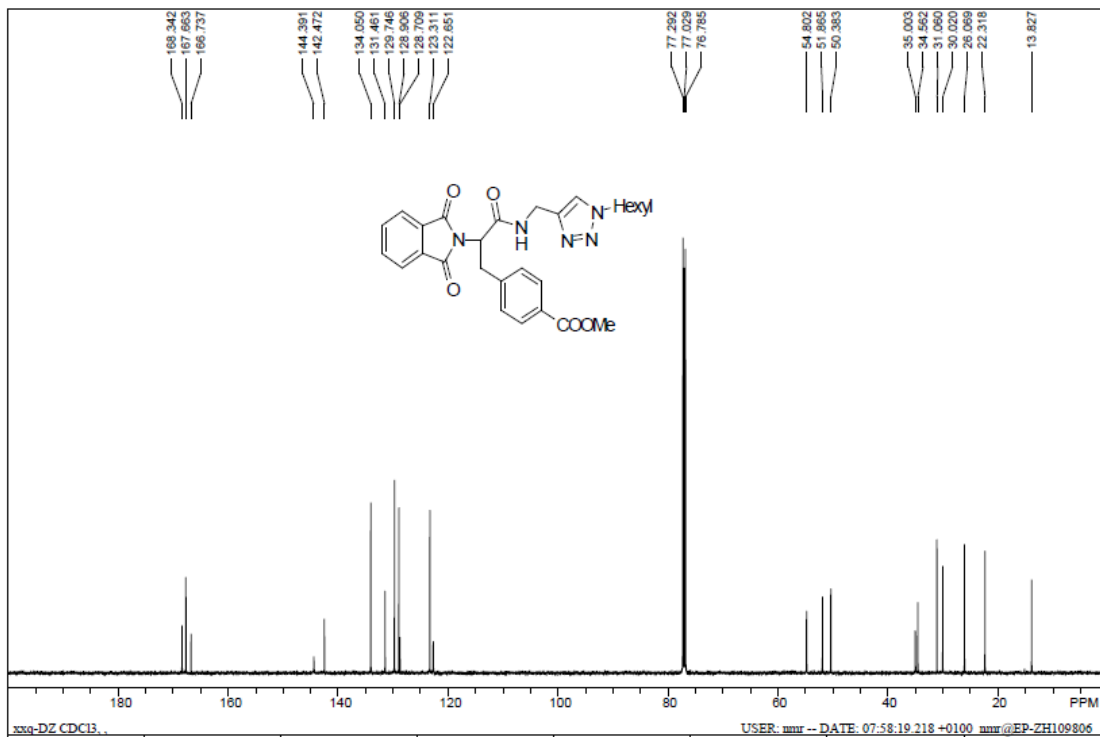

Figure 15.  $^1\text{H}$  NMR and  $^{13}\text{C}$  NMR spectra of 3ao

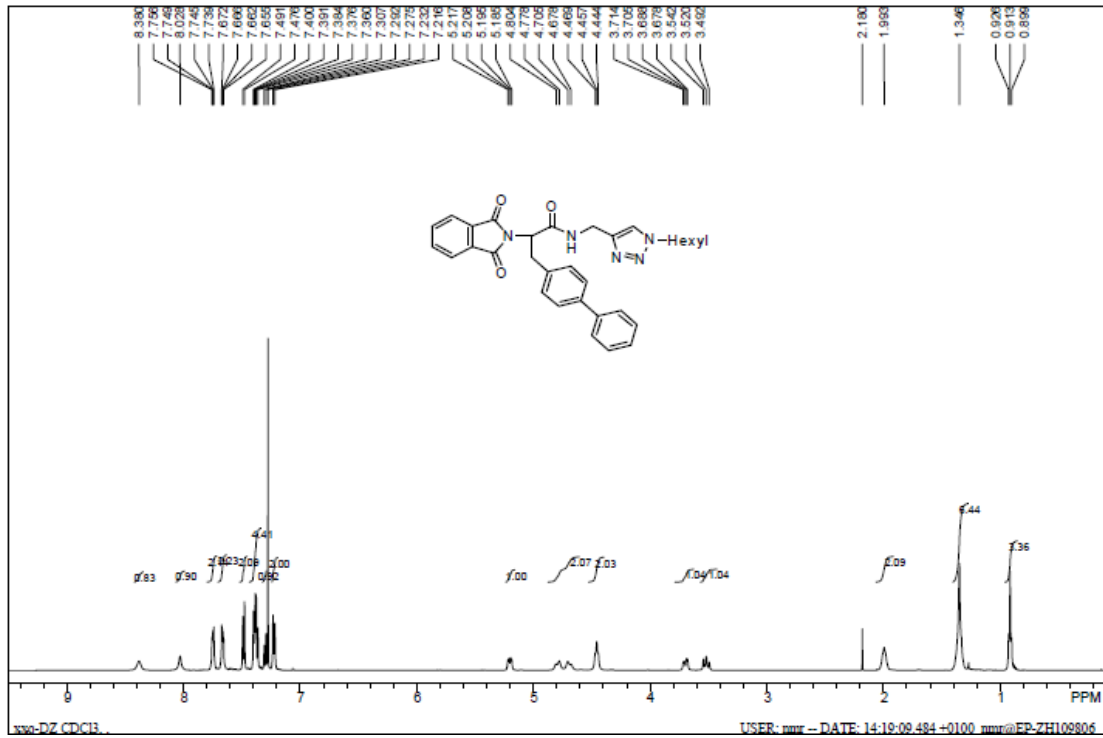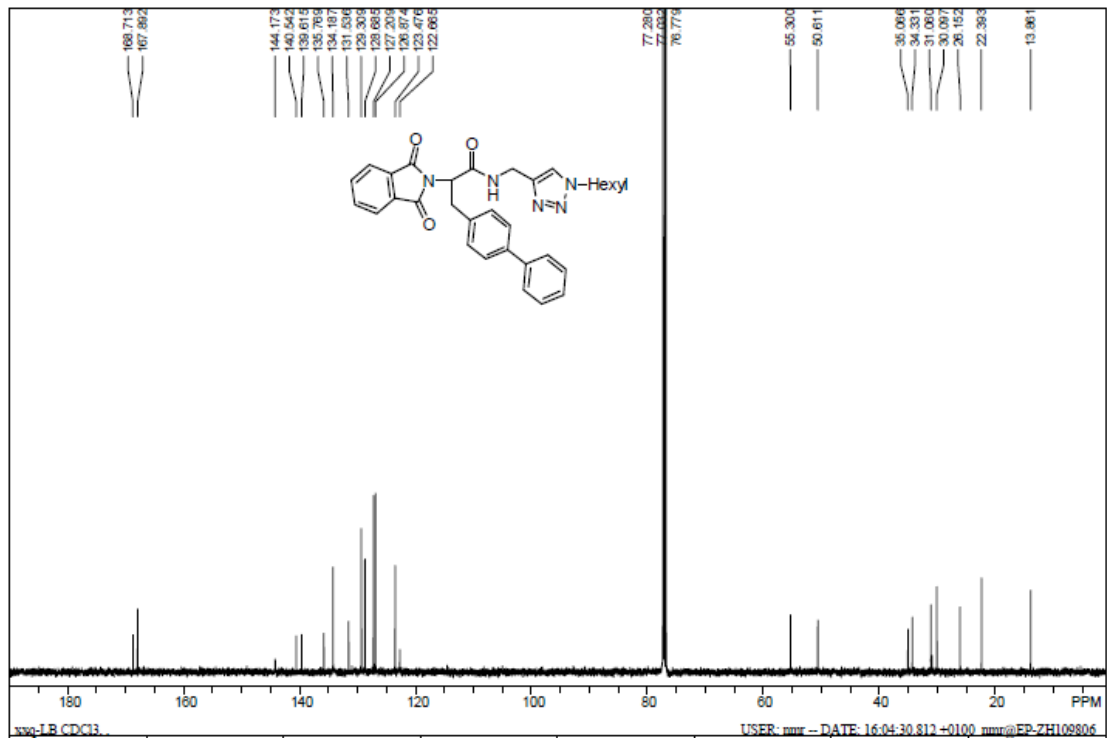

Figure 16. <sup>1</sup>H NMR and <sup>13</sup>C NMR spectra of 3ap

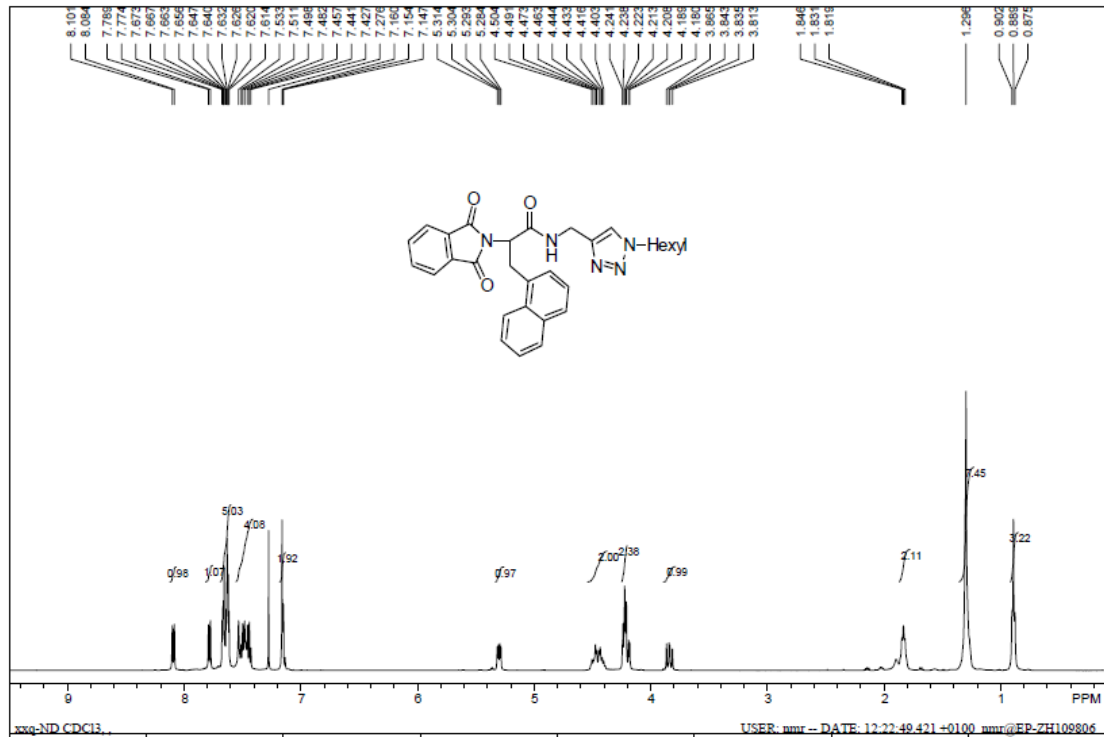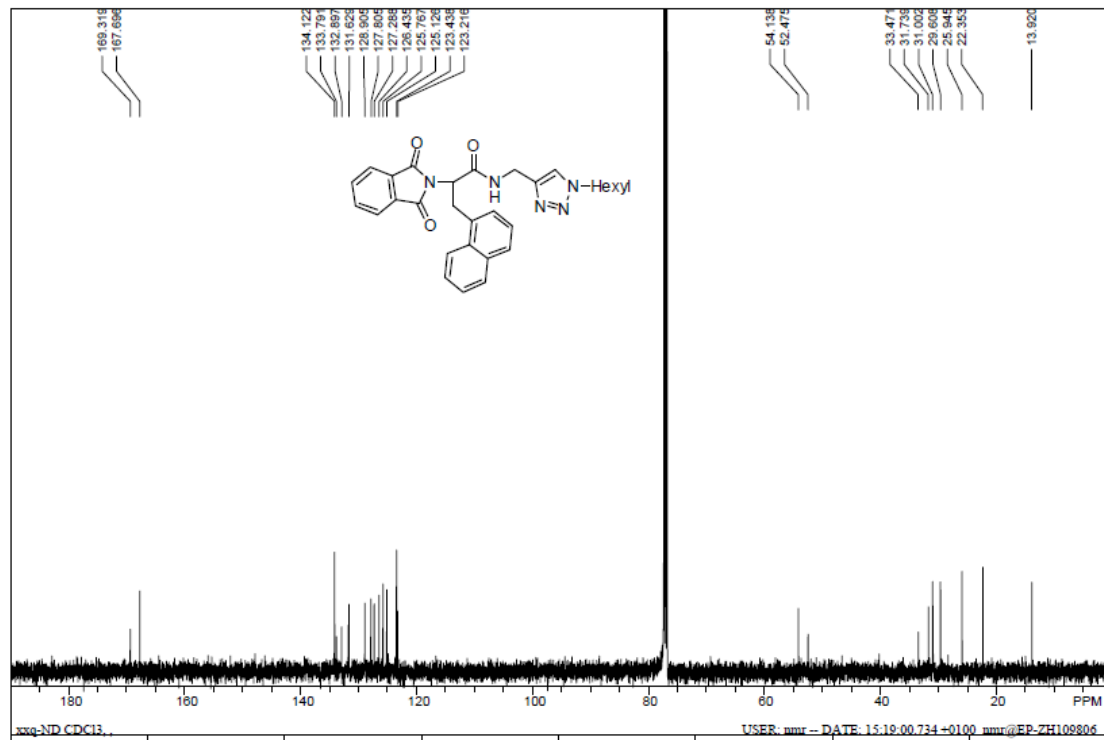

Figure 17. <sup>1</sup>H NMR and <sup>13</sup>C NMR spectra of 3bj

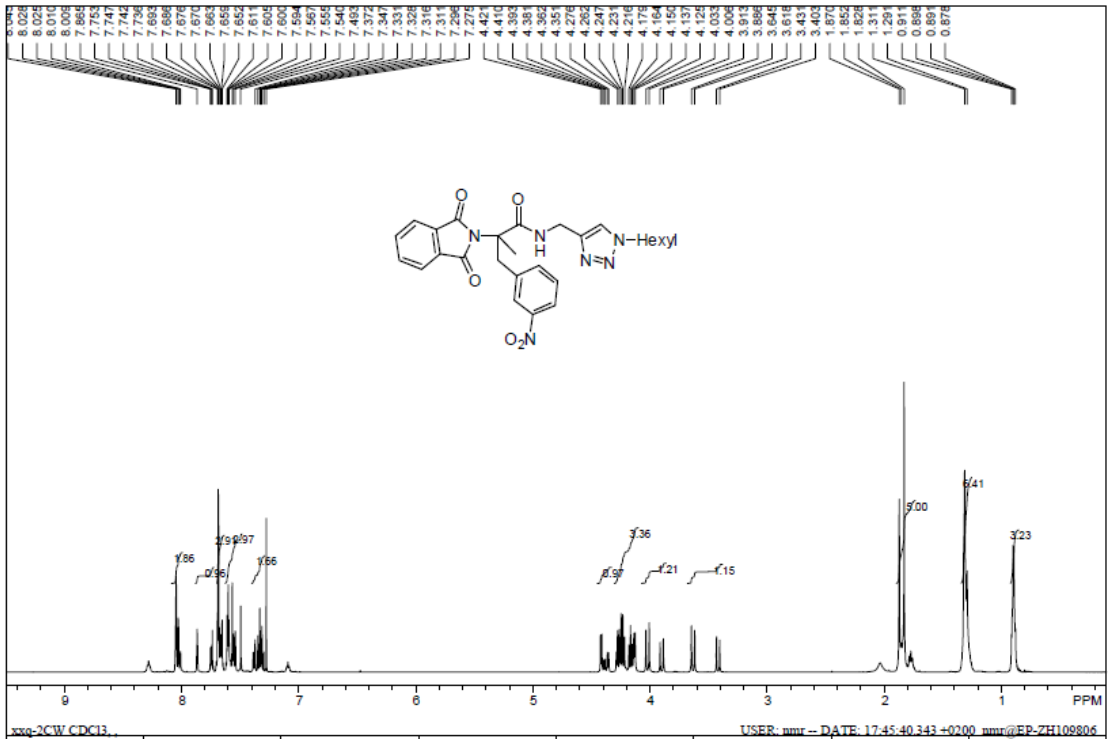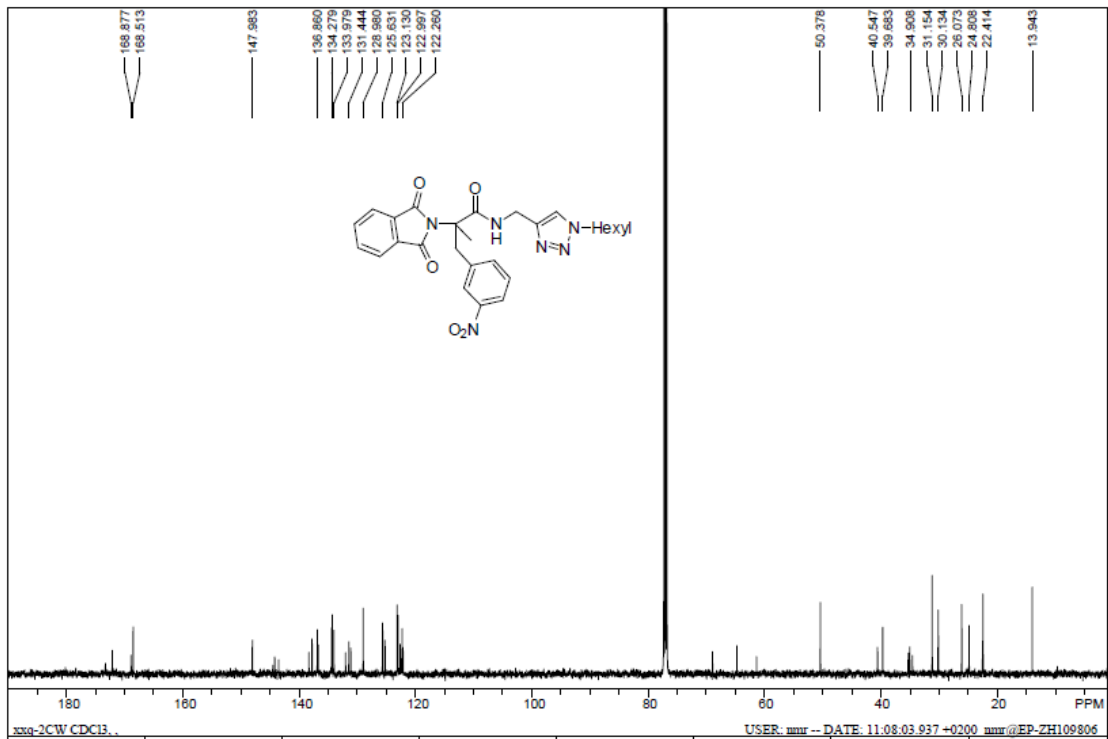

Figure 18.  $^1\text{H}$  NMR and  $^{13}\text{C}$  NMR spectra of 3cg

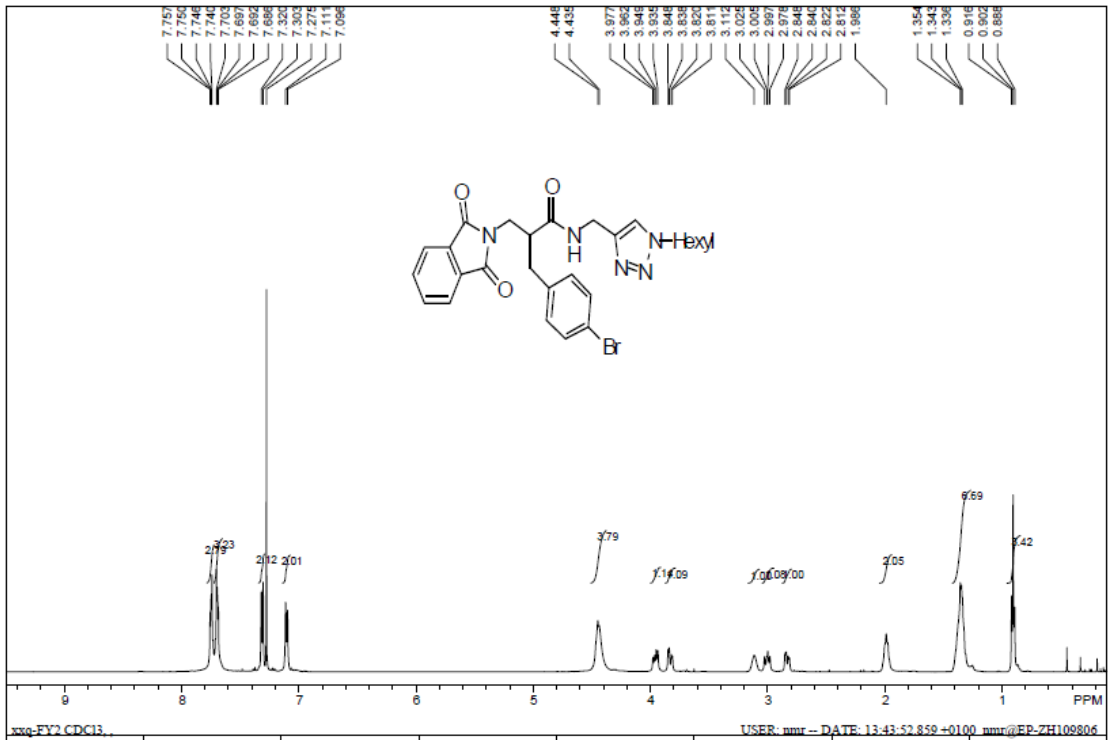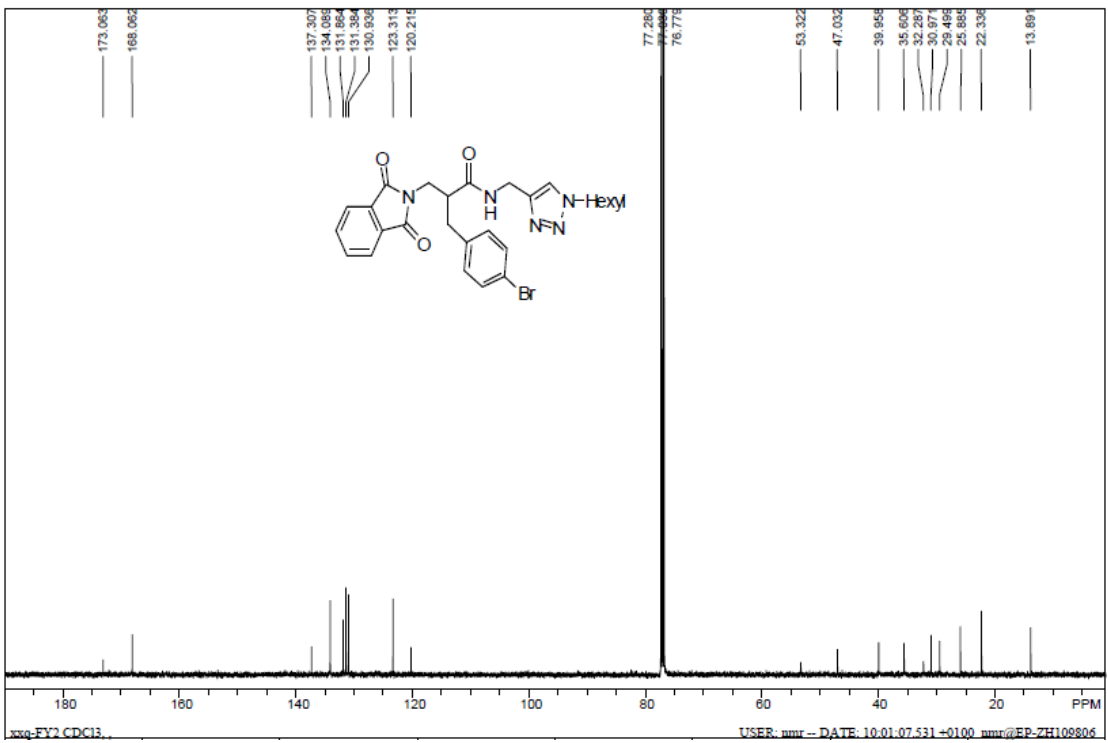

Figure 19.  $^1\text{H}$  NMR and  $^{13}\text{C}$  NMR spectra of 4ai

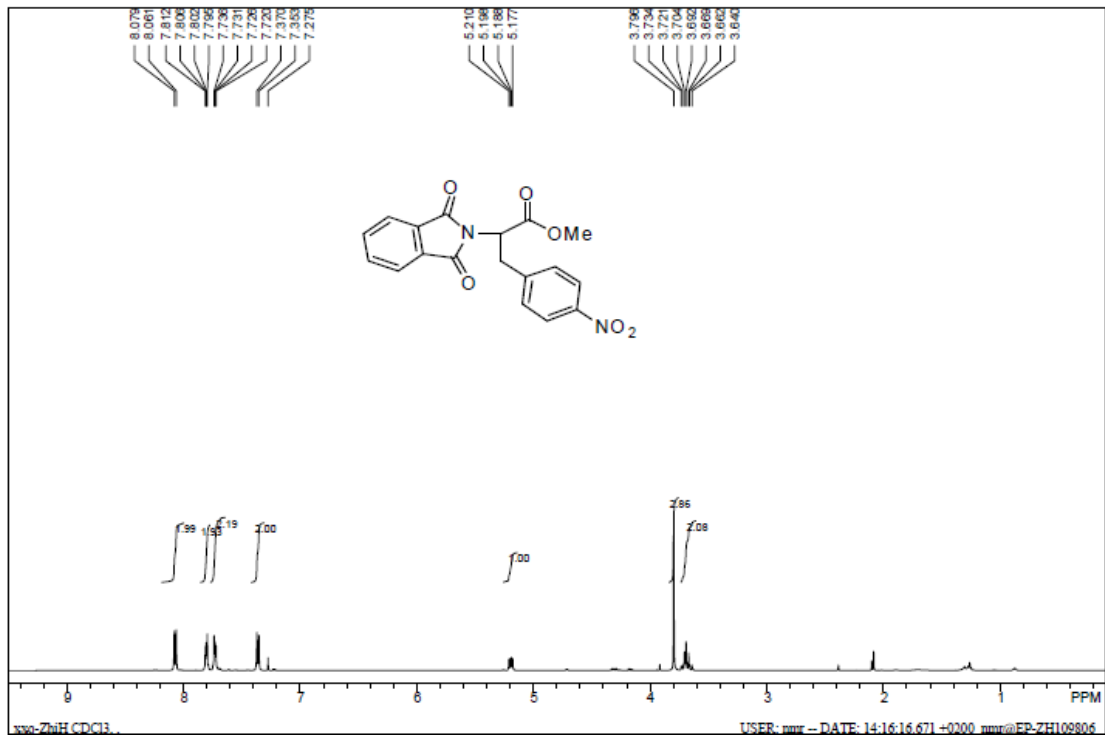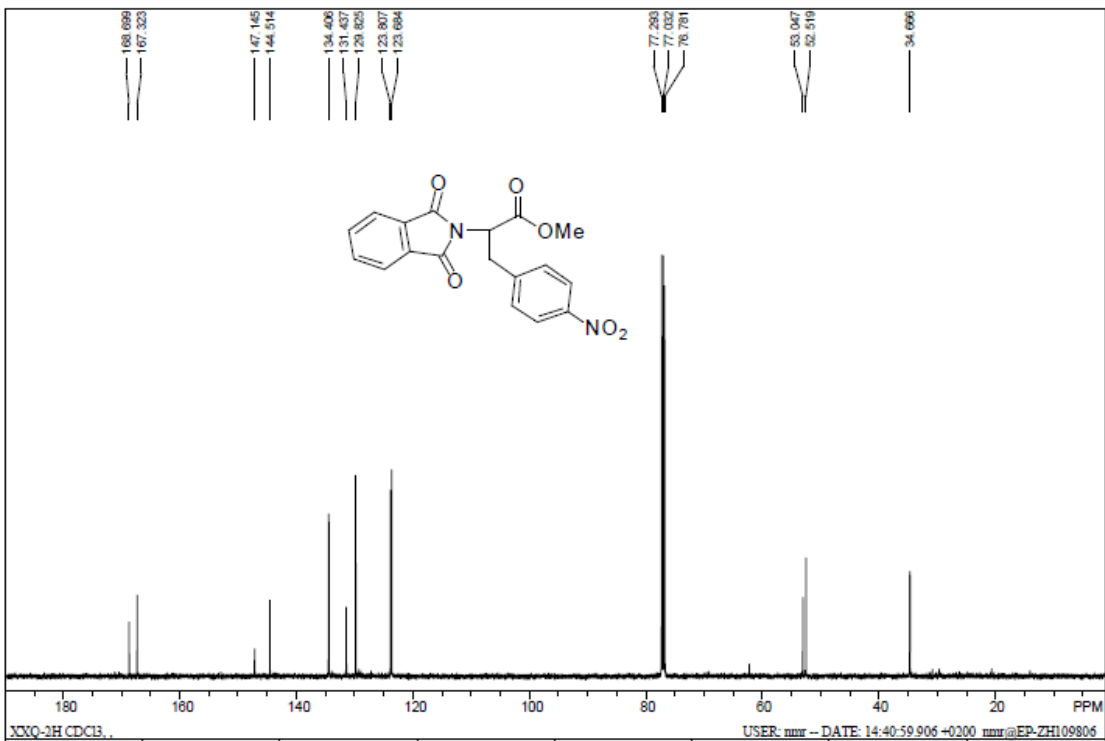

Figure 20. <sup>1</sup>H NMR and <sup>13</sup>C NMR spectra of 5ai

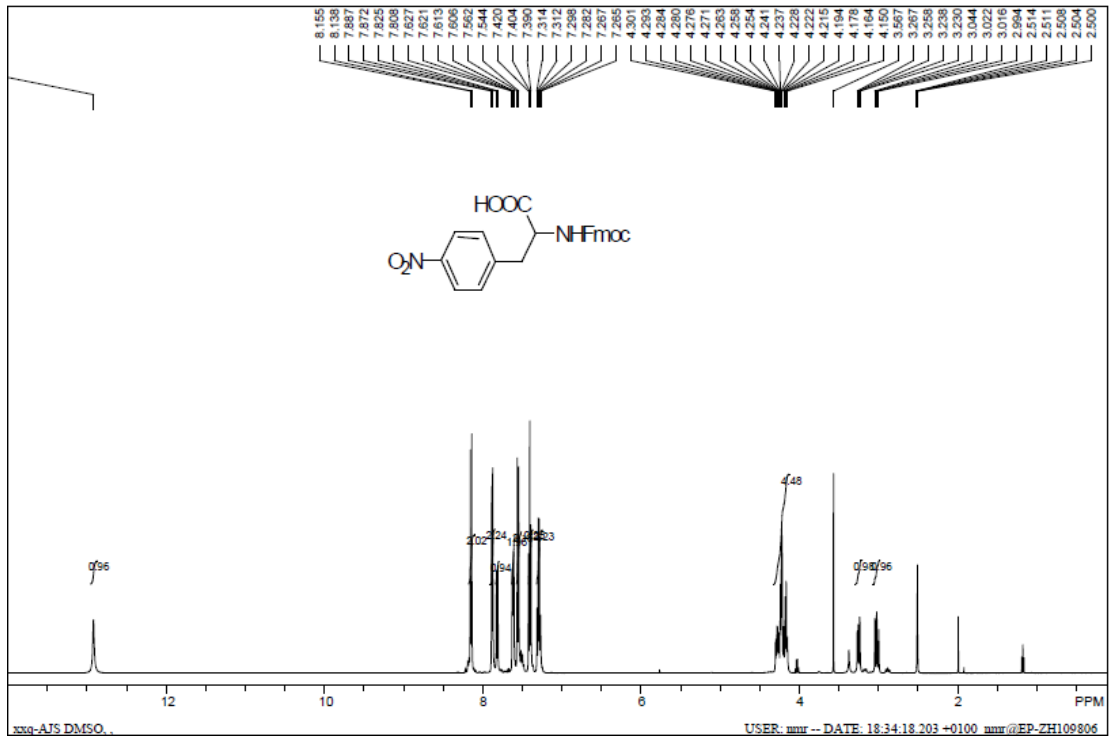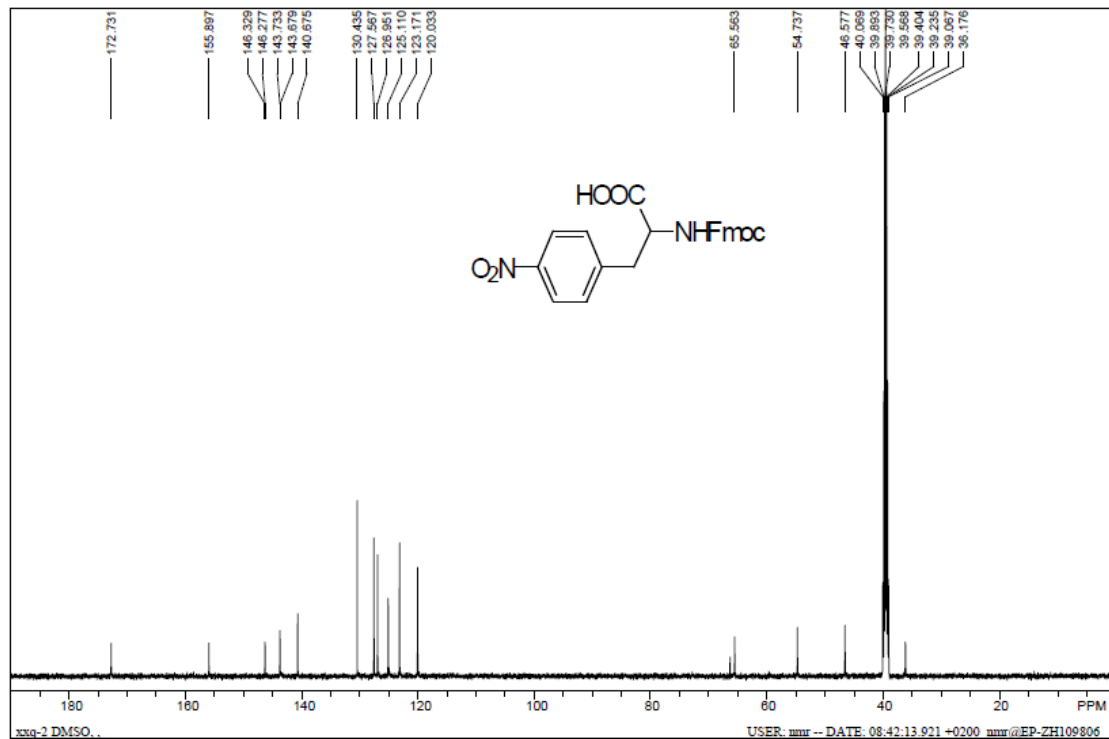

Supplement: c5ob00066a1.pdf [file c5ob00066a1.pdf]
